# Supplementary material
Source: ML conference proceedings conference paper supplement (https://openaccess.thecvf.com/content/CVPR2026/html/Wang_X-PCR_A_Benchmark_CVPR_2026_paper.html)
Supplement: Supplementary file 1 [file Wang_X-PCR_A_Benchmark_CVPR_2026_supplemental.pdf]

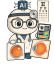

# X-PCR: A Benchmark for Cross-modality Progressive Clinical Reasoning in Ophthalmic Diagnosis

## Supplementary Material

### 1. Dataset Details

**Complete Source List.** Table 1 summarizes the 51 public ophthalmic imaging datasets integrated into X-PCR. These datasets were compiled from diverse geographic sources, including Asia (China, India, Bangladesh, Japan), Europe (Spain, Czech Republic), and North America (United States), capturing a broad spectrum of clinical settings and patient demographics.

**Task Coverage and Annotation Richness.** The source datasets span a wide range of supervision types, including image-level classification (presence/absence, severity grading such as DR stages, and multi-label diagnosis, *e.g.*, ODIR-5K with 8 classes, JSIEC Retinal39 with 39 classes, RFMiD2.0 with 45 labels), pixel-level segmentation of anatomical structures (optic disc/cup, vessels, retinal layers) and pathological lesions (hemorrhages, exudates, drusen, fluid), as well as detection and localization tasks for fovea, lesions, and image quality. Several datasets provide rich, multi-task annotations; for example, REFUGE and GAMMA jointly supply classification labels and optic disc/cup masks, while OIA-DDR combines DR grading with lesion segmentation and detection. This diversity of labels enables us to construct VQA pairs that probe recognition, localization, and reasoning in a unified framework.

**Imaging Modalities and Disease Spectrum.** The datasets cover six primary ophthalmic imaging modalities, namely *External Photography (EP)*, *Color Fundus Photography (CFP)*, *Fluorescein Angiography (FFA)*, *Indocyanine Green Angiography (ICGA)*, *Optical Coherence Tomography (OCT)*, and *RetCam*. Collectively, they span eight major disease categories relevant to clinical practice. Diabetic retinopathy is the most represented condition (datasets 7–10, 25–26, 36–38, 45), reflecting its status as a leading cause of vision loss worldwide. Glaucoma datasets (1–6, 21–24, 34, 40–41, 44, 46) provide extensive coverage of this chronic optic neuropathy, from early screening to progression monitoring. Age-related macular degeneration and other macular diseases are captured by OCT-centric datasets (11, 16, 31, 43, 49, 51) and multi-disease collections (12, 14–15, 17–18, 42, 47). Additional datasets on retinopathy of prematurity (20, 28), pathological myopia (29), and toxoplasmosis (19) ensure that rarer but clinically important entities are also included.

**Licensing and Accessibility.** All datasets were selected for their public availability under open licenses or formal re-

search agreements. Most are released under Creative Commons licenses (*e.g.*, CC BY, CC BY-NC) or comparably permissive terms that allow academic use and redistribution, enabling X-PCR to adhere to open-access and reproducibility principles. Overall, Table 1 provides the basis for understanding the breadth and depth of X-PCR’s source data and illustrates our aim to comprehensively cover the ophthalmic imaging landscape.

### 2. Imaging Modality Specifications

X-PCR encompasses six distinct ophthalmic imaging modalities, each offering unique diagnostic capabilities and complementary perspectives on ocular pathology. This section provides detailed technical descriptions, clinical applications, and quality characteristics for each modality.

#### 2.1. External Photography (EP)

**Technical Principles.** External photography captures the anterior segment and periocular structures using standard digital cameras or dedicated ophthalmic imaging systems. In contrast to fundus photography, which targets the posterior pole, EP focuses on external ocular anatomy, *e.g.*, eyelids, conjunctiva, cornea, iris, and anterior lens surface.

**Clinical Applications.** External photography is routinely used for cataract assessment (visualizing lens opacities, nuclear sclerosis, and cortical changes through the pupil), anterior segment pathology (corneal opacities, pterygium, pinguecula, conjunctival lesions), eyelid disorders (chalazion, hordeolum, blepharitis, ptosis), ocular surface disease (dry eye, related signs, limbal stem cell deficiency), and pupillary abnormalities (anisocoria, iris defects, posterior synechiae). In X-PCR, EP images primarily support cataract grading tasks, in which lens opacity severity is assessed from nuclear color and cortical spoke patterns.

**Sample Characteristics in X-PCR.** X-PCR curates 4,064 high-quality EP images from an initial collection of 5,335 in Dataset 47 (Table 1). Image resolutions range from  $640 \times 480$  to  $4288 \times 2848$  pixels, with most images acquired at  $\geq 1920 \times 1080$ . Representative examples are shown in Fig. 1, illustrating (a) a normal anterior segment, (b) a cataract with lens opacity visible through the pupil, and (c) conjunctival hyperemia consistent with “red eye.”

#### 2.2. Color Fundus Photography (CFP)

**Technical Principles.** Color fundus photography is the most widely used retinal imaging modality, employing

Table 1. Summary of 51 public ophthalmic datasets.

| Index | Dataset              | Size    | Source                                              | Description                                                       |
|-------|----------------------|---------|-----------------------------------------------------|-------------------------------------------------------------------|
| 1     | ACRIMA [15]          | 705     | FISABIO Oftalmologia Medica                         | Glaucoma classification                                           |
| 2     | LAG [33]             | 11,760  | Beijing Tongren Hospital                            | Glaucoma classification                                           |
| 3     | BEH [25]             | 634     | Bangladesh Eye Hospital                             | Glaucoma classification                                           |
| 4     | AIROGS [10]          | 113,893 | 500 sites                                           | Glaucoma classification                                           |
| 5     | Harvard-GDP [1]      | 1,544   | Harvard Medical School                              | Glaucoma classification                                           |
| 6     | JustRAIGS [29]       | 111,183 | EyePACS LLC, US                                     | 2 classes (RG, NRG) + 10                                          |
| 7     | Messidor-2 [11]      | 1,748   | Brest University Hospital                           | Diabetic retinopathy                                              |
| 8     | Eyepacs [27]         | 35,126  | Aravind, Sankara Nethralaya, Narayana Nethralaya    | DR severity grading                                               |
| 9     | DeepDRiD [37]        | 2,000   | Shanghai Sixth People’s Hospital                    | 5 classes                                                         |
| 10    | BiDR [60]            | 2,838   | Not reported                                        | DR severity grading                                               |
| 11    | OCT2017 [28]         | 108,312 | Not reported                                        | 4 classes: CNV, DME, DRUSEN, NORMAL                               |
| 12    | ODIR-5K [34]         | 5,000   | Shanggong Medical Technology                        | 8 classes                                                         |
| 13    | SUSTech-SYSU [13]    | 712     | Zhongshan Ophthalmic Center, Sun Yat-sen University | Multi-label: 3 categories $\times$ 5 types $\times$ 5 grades      |
| 14    | JSIEC Retinal39 [5]  | 1,000   | Joint Shantou International Eye Center              | 39-class classification                                           |
| 15    | MuReD [47]           | 2,208   | ARIA, STARE, RFMiD datasets                         | 20-disease classification                                         |
| 16    | Retinal OCT-C8 [28]  | 24,000  | OCT2017 dataset                                     | 8 classes: AMD, CNV, CSR, DME, MH, Drusen, DR, Normal             |
| 17    | RFMiD2.0 [44]        | 3,200   | Shri Guru Gobind Singhji                            | 45 labels                                                         |
| 18    | MedMNISTv2 [57]      | 109,309 | 12 2D datasets and 6 3D datasets                    | 12 2D datasets                                                    |
| 19    | ToxoFundus [22]      | 412     | Hospital de Clinicas Medical Center                 | 4 classes                                                         |
| 20    | FARFUM RoP [40]      | 1,533   | Farabi Eye Hospital                                 | 3 stages                                                          |
| 21    | REFUGE [43]          | 1,200   | Not reported                                        | Glaucoma classification and optic disc/cup segmentation           |
| 22    | RIM-ONE DL [21]      | 485     | HUC, HUMS, HCSC, Spain                              | Glaucoma classification and optic disc/cup segmentation           |
| 23    | GAMMA [32]           | 300     | Zhongshan Ophthalmic Center, Sun Yat-sen University | Glaucoma grading, fovea localization, optic disc/cup segmentation |
| 24    | Harvard-FairSeg [19] | 10,000  | Harvard University and large academic eye hospitals | Segmentation                                                      |
| 25    | DRAC22 [38]          | 1,103   | Not reported                                        | segmentation, 3-class(Non-DR, NPDR, PDR)                          |
| 26    | MAPLES-DR [8]        | 198     | MESSIDOR dataset                                    | 12-class                                                          |
| 27    | HVDROPDB [2]         | 600     | Desai Eye Hospital                                  | Segmentation                                                      |
| 28    | RetinalROP [53]      | 6,004   | University Hospital Ostrava                         | segmentation                                                      |
| 29    | PALM [20]            | 1,200   | Not reported                                        | classification, segmentation, localization                        |
| 30    | FIVES [26]           | 800     | Second Affiliated Hospital of Zhejiang University   | 4-class task                                                      |
| 31    | AMD-SD [23]          | 3,048   | Second Affiliated Hospital of Nanchang University   | Segmentation: IRF, SRF, PED, SHRM, IS/OS disruption               |
| 32    | OCTA-500 [46]        | 500     | Jiangsu Province Hospital                           | —                                                                 |
| 33    | OLIVES [48]          | 1,268   | Retina Consultants of Texas                         | Segmentation                                                      |
| 34    | Harvard-GF [16]      | 3,300   | Not reported                                        | Glaucoma detection, segmentation                                  |
| 36    | OIA-DDR [35]         | 13,673  | 147 hospitals across 23 provinces in China          | DR classification, segmentation, detection                        |
| 37    | IDRiD [45]           | 1,032   | India                                               | Labels for DR severity and diabetic macular edema                 |
| 38    | MESSIDOR2 [?] ]      | 1,748   | Brest University Hospital                           | Diabetic retinopathy (DR)                                         |
| 40    | PAPILA [14]          | 488     | Carlos III Health Institute                         | segmentation                                                      |
| 41    | Glaucoma Fundus [17] | 1,544   | Harvard database                                    | —                                                                 |
| 42    | Retina [54]          | 601     | Not reported                                        | 4 classes                                                         |
| 43    | OCTID [39]           | 587     | University of Waterloo                              | 6-class classification task                                       |
| 44    | REFUGE2 [52]         | 1,200   | Not reported                                        | segmentation, localization                                        |
| 45    | APTOS-2019 [51]      | 5,590   | Aravind Eye Hospital, India                         | 5 DR grades                                                       |
| 46    | Harvard-GDP [18]     | 3,300   | Asian, Black, and White                             | Includes visual field, demographics, and glaucoma labels          |
| 47    | Eye Disease [24]     | 5,335   | Bangladesh Eye Hospital                             | 10-class classification                                           |
| 48    | OIMHS [58]           | 3,859   | Multiple centers in Asia                            | Segmentation of retina, macular hole, intraretinal cysts, choroid |
| 49    | OCT5k [61]           | 1,672   | UCL Institute of Ophthalmology                      | Segmentation and detection tasks                                  |
| 50    | EyePhotos [9]        | 30,000  | Not reported                                        | —                                                                 |
| 51    | Retinal OCT [28]     | 84,495  | Not reported                                        | 4 classes: NORMAL, CNV, DME, DRUSEN                               |

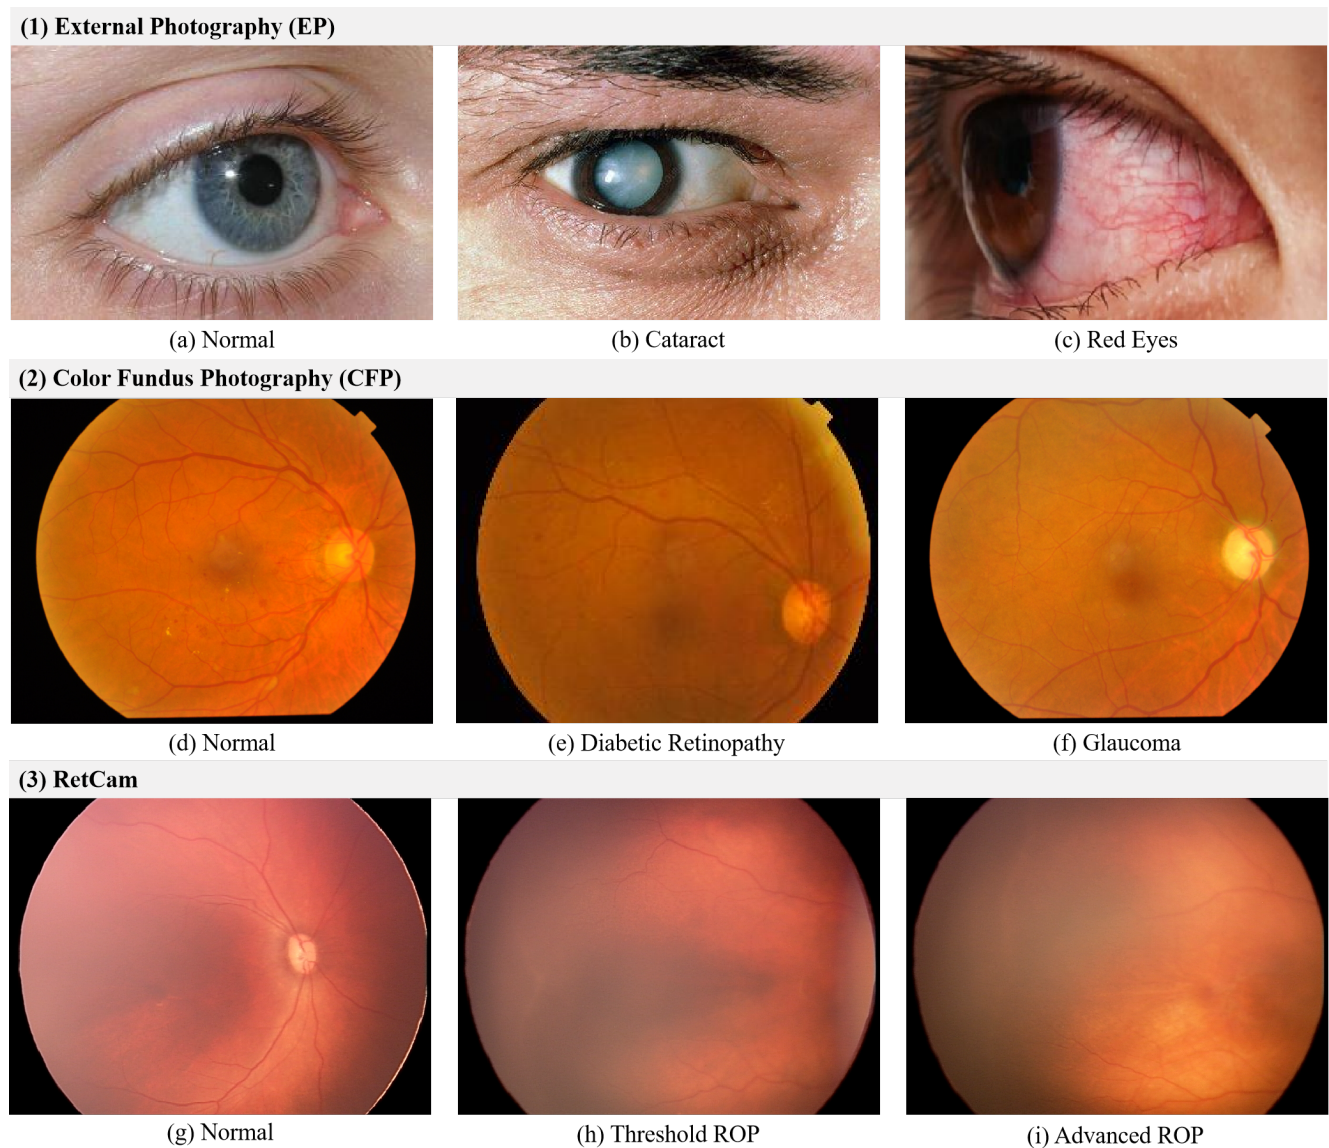

Figure 1. Representative ophthalmic images. (a–c) External photography (EP); (d–f) color fundus photography (CFP); (g–i) pediatric RetCam images.

white-light illumination to acquire two-dimensional color views of the posterior segment. Modern fundus cameras project light through the undilated or dilated pupil via a dedicated optical system that minimizes corneal reflections. Image contrast arises from the reflective properties of the retinal pigment epithelium and choroid, with melanin and hemoglobin absorption producing the characteristic red–orange fundus appearance.

**Clinical Applications.** Color fundus photography is a primary tool for screening and monitoring a broad spectrum of retinal diseases. In diabetic retinopathy, it enables the detection of microaneurysms, hemorrhages, exudates, cotton-wool spots, neovascularization, and retinal thickening. For

glaucoma, CFP supports assessment of optic disc morphology, including cup-to-disc ratio, neuroretinal rim thinning, and disc hemorrhages, as well as retinal nerve fiber layer defects. In age related macular degeneration, it reveals drusen, geographic atrophy, pigmentary changes, and signs suggestive of choroidal neovascularization. CFP is also essential for grading hypertensive retinopathy (AV nicking, vessel tortuosity, flame hemorrhages, macular star), characterizing retinal vein occlusion (dilated tortuous veins, intraretinal hemorrhages, macular edema), and documenting pathological myopia (lacquer cracks, chorioretinal atrophy).

**Sample Characteristics in X-PCR.** In X-PCR, CFP constitutes the largest imaging subset, select 6,840 high-

### (1) Fluorescein Angiography (FFA)

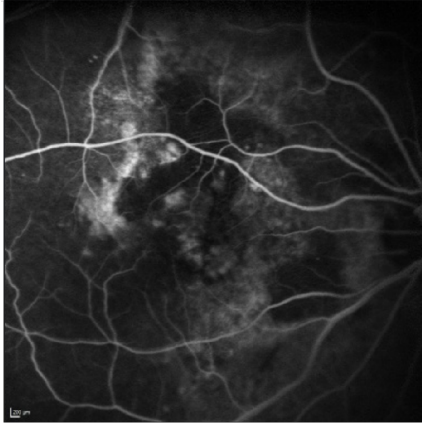

(a) Normal

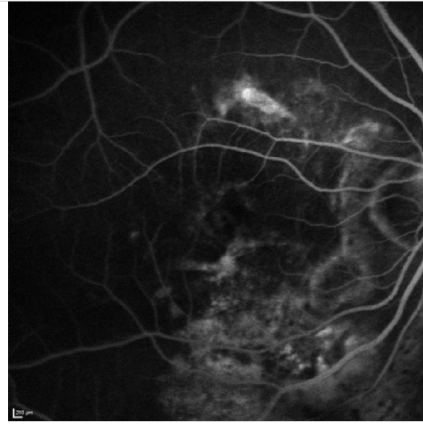

(b) Macular Neovascularization

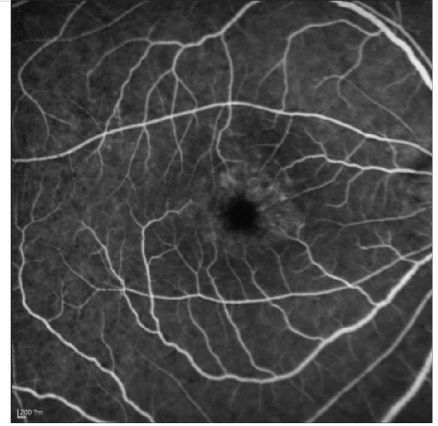

(c) Cystoid Macular Edema

### (2) Indocyanine Green Angiography (ICGA)

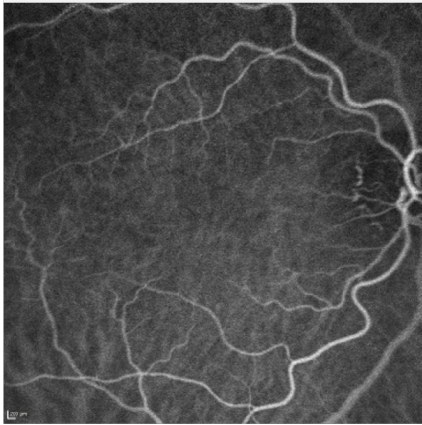

(d) Normal

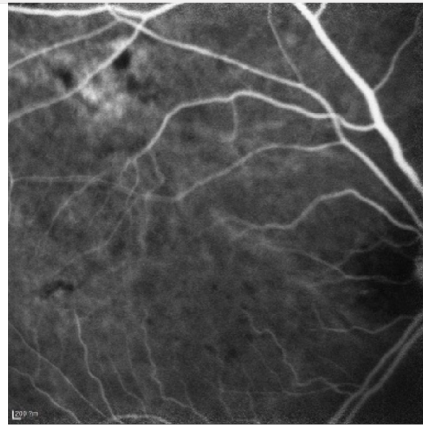

(e) Uveitis

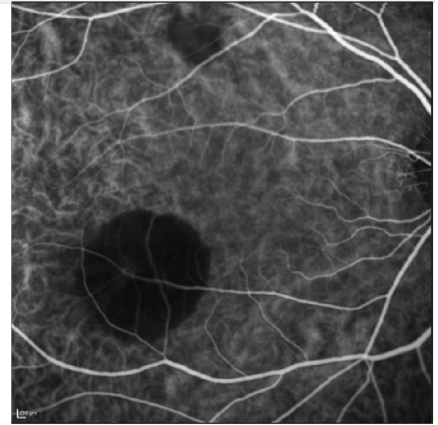

(f) Central Serous Chorioretinopathy

### (3) Optical Coherence Tomography (OCT)

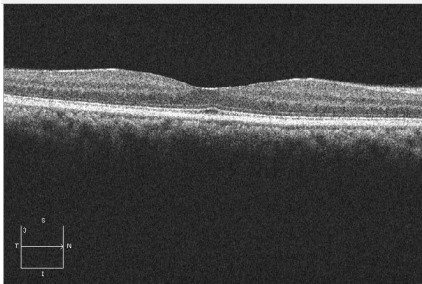

(g) Normal

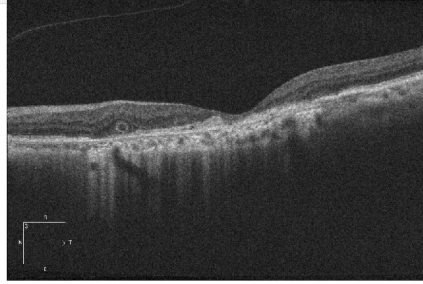

(h) Age-related Macular Degeneration

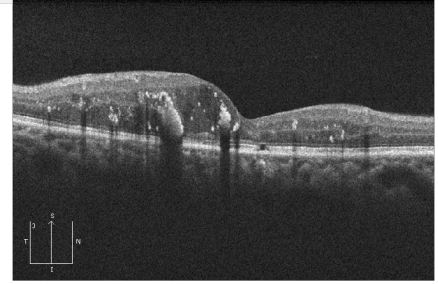

(i) Diabetic Retinopathy Retinal

Figure 2. Representative ophthalmic images. (a–c) Fluorescein Angiography (FFA); (d–f) Indocyanine Green Angiography (ICGA); (g–i) Optical Coherence Tomography (OCT).

quality images from 8 datasets (including Eyepacs, Messidor-2, APTOS-2019, ODIR-5K, and others in Table 1). Fig. 1 shows representative cases: (d) a normal fundus with a well-defined optic disc and foveal reflex, (e) moderate non-proliferative diabetic retinopathy with microaneurysms and hard exudates, and (f) glaucomatous op-

tic neuropathy with an enlarged cup-to-disc ratio and inferotemporal rim thinning.

### 2.3. RetCam

**Technical Principles.** RetCam (Natus Medical Inc.) is a wide-field digital fundus imaging system specifically en-

gineered for pediatric retinal examination, particularly in neonates and infants. Compared with conventional adult fundus cameras, RetCam uses a contact wide-angle lens and flexible optics that accommodate the steep corneal curvature, small palpebral fissure, and often undilated pupils of infant eyes, enabling panretinal views in this challenging population.

**Clinical Applications.** RetCam is now a core tool in pediatric ophthalmology, with retinopathy of prematurity (ROP) screening as its principal indication. It allows documentation of avascular peripheral retina, demarcation lines and ridges, plus disease (vascular tortuosity and dilation), and supports standardized staging (Stages 1–5) and zone classification (I–III). RetCam is also used to visualize peripheral vascular anomalies in familial exudative vitreo-retinopathy and other infantile retinal vasculopathies.

**Sample Characteristics in X-PCR.** In X-PCR, the RetCam subset select 5,403 images curated from two ROP-focused datasets (datasets 20 and 28 in Table 1). Representative examples in Fig. 1 (RetCam panel) illustrate (g) a normal fully vascularized retina in a term infant, (h) threshold ROP with dense vitreoretinal proliferation obscuring posterior pole details, and (i) advanced ROP with diffuse media haze and poorly visualized retinal vasculature.

## 2.4. Fluorescein Angiography (FFA)

**Technical Principles.** Fluorescein angiography is a dynamic imaging technique that visualizes retinal and, to a lesser extent, choroidal circulation by recording the passage of intravenously injected sodium fluorescein. Blue excitation light (approximately 465–490 nm) stimulates fluorescein molecules, which emit yellow–green light (approximately 520–530 nm) that is captured through a barrier filter. Sequential images acquired at standardized time points sample the arterial, arteriovenous, and venous phases, enabling phase-resolved vascular assessment.

**Clinical Applications.** Fluorescein angiography provides critical diagnostic information for a range of retinal vascular disorders. In diabetic retinopathy, it delineates capillary non-perfusion, microaneurysm leakage, and neovascularization. In age-related macular degeneration, it characterizes choroidal neovascularization (classic, occult, mixed) and leakage patterns that guide treatment eligibility. For retinal vein occlusion, FFA quantifies ischemic areas, collateral vessel formation, and macular edema leakage. It is also central to diagnosing central serous chorioretinopathy (focal leakage points, smokestack patterns), retinal vasculitis (vessel wall staining and leakage), and selected inherited retinal diseases (*e.g.*, transmission defects in retinitis pigmentosa and pattern dystrophies).

**Sample Characteristics in X-PCR.** In X-PCR, we select 3,356 high-quality images from 6 source datasets, primarily specialized retinal disease cohorts. The collection

spans early (~30%), mid (~45%), and late (~25%) phases, providing complementary views of dye filling, leakage, and staining. Image resolution typically ranges from  $768 \times 768$  to  $2048 \times 2048$  pixels. Representative examples in Fig. 2 illustrate three macular phenotypes: (a) a normal macular angiogram, (b) macular neovascularization with abnormal subfoveal vascular complexes, and (c) cystoid macular edema with petaloid leakage in the macular region.

## 2.5. Indocyanine Green Angiography (ICGA)

**Technical Principles.** Indocyanine green angiography complements FFA by specifically visualizing choroidal circulation using indocyanine green (ICG), which fluoresces in the near-infrared range (excitation ~790–805 nm, emission ~835 nm). In contrast to fluorescein, ICG is ~98% protein-bound, producing minimal leakage from choriocapillaris fenestrations. The longer wavelength penetrates the retinal pigment epithelium and hemoglobin more effectively, yielding superior visualization of choroidal vessels and filling patterns. ICGA follows FFA-like early, mid, and late phases but with emphasis on choroidal perfusion and dye pooling.

**Clinical Applications.** Indocyanine green angiography is particularly valuable in diseases with predominant choroidal involvement. In polypoidal choroidal vasculopathy, it reveals polypoidal lesions and branching vascular networks that may be inconspicuous on FFA. In central serous chorioretinopathy, ICGA demonstrates choroidal vascular hyperpermeability and dilated choroidal vessels. It refines subtype classification in neovascular AMD by distinguishing occult CNV patterns and detecting retinal angiomatous proliferation. ICGA also aids in assessing choroidal tumors (melanoma, hemangioma) and inflammatory chorioretinopathies, such as multifocal choroiditis and birdshot chorioretinopathy, where hypofluorescent dark dots highlight areas of choroidal hypoperfusion or infiltration.

**Sample Characteristics in X-PCR.** In X-PCR, we select 3,356 high-quality images from 2 specialized macular disease datasets. Fig. 2 illustrates (d) a normal ICGA with regular choroidal filling and large-caliber vessels, (e) uveitis with vascular leakage and patchy hypofluorescent dark areas, and (f) central serous chorioretinopathy with regions of choroidal hyperpermeability in the macular area.

## 2.6. Optical Coherence Tomography (OCT)

**Technical Principles.** Optical coherence tomography uses low-coherence interferometry to acquire high-resolution cross-sectional images of retinal microstructure. Spectral-domain OCT (SD-OCT), the current clinical standard, records the interference pattern between light reflected from retinal layers in the sample arm and a reference beam using a spectrometer, enabling micrometer-scale axial resolution.

**Clinical Applications.** OCT has transformed the diagnosis and monitoring of macular and retinal disease. In diabetic macular edema, it quantifies central subfield thickness and reveals intraretinal cysts, subretinal fluid, and hard exudate deposits. In age-related macular degeneration, OCT visualizes drusen morphology, retinal pigment epithelium detachment, and subretinal or intraretinal fluid from choroidal neovascularization, as well as geographic atrophy. For glaucoma, it provides quantitative measurements of retinal nerve fiber layer thickness, ganglion cell complex integrity, and optic nerve head morphology. OCT is also indispensable for staging macular holes, characterizing epiretinal membranes and associated foveal contour distortion, assessing macular edema and inner retinal thickening in retinal vein occlusion, and evaluating subretinal fluid, RPE irregularities, and choroidal thickness in central serous chorioretinopathy.

**Sample Characteristics in X-PCR.** In X-PCR, OCT is the second-largest imaging modality, we select 8,199 B-scans and corresponding en face projections from 13 datasets (including OCT2017, Retinal OCT-C8, OLIVES, AMD-SD, OCTID, and OCT5k; see Table 1). Fig. 2 illustrates (g) a normal macular scan with well-delineated retinal layers and a central foveal depression, (h) age-related macular degeneration with drusen deposition and pigment epithelial detachment in the macular region, and (i) diabetic retinopathy with cystoid changes and macular thickening on OCT.

### 3. VQA Generation Details

X-PCR’s VQA generation pipeline transforms heterogeneous clinical annotations into a unified question-answer framework aligned with the six-stage progressive clinical reasoning chain. This section details the systematic conversion strategies, template taxonomy, and quality assurance mechanisms.

#### 3.1. Progressive Reasoning Aligned Question Taxonomy

**Stage 1: Image Quality Assessment (IQA).** Stage 1 targets pre-diagnostic image quality control, ensuring that subsequent clinical reasoning is not confounded by technically inadequate inputs. Question types are aligned with three core skills: (1) *Binary quality classification*, where the model judges whether a given modality-specific image is of sufficient quality for a specified clinical task (e.g., DR screening, macular edema evaluation). (2) *Quality defect identification*, where the model enumerates technical artifacts (e.g., blur, motion, under/overexposure, truncation, mirror or banding artifacts) and specifies which anatomical regions and diagnostic subtasks are affected.

Listing 1. Example template for Stage 1 IQA QA pair.

```
Q (Stage 1 - IQA, <MODALITY>):
  "Is this <MODALITY> image of sufficient
   quality for <CLINICAL_TASK>?"

A:
  "<YES/NO>. <JUSTIFICATION: affected
   regions (e.g., macula, optic disc,
   periphery).>"
```

**Annotation Conversion.** Source datasets with explicit image-quality flags are converted into binary IQA questions. Adversarial low-quality images (e.g., low resolution, high blur, severe artifacts) serve as negative examples emphasizing defect recognition, while a curated high-quality subset provides positive examples focused on diagnostic adequacy.

**Stage 2: Anatomical Localization (AL).** Stage 2 establishes a spatial reference frame for lesion mapping and pathology interpretation. We design three AL-oriented question families: (1) *structure identification*, asking the model to localize key anatomy (e.g., optic disc) using clock-hours, quadrants, or disc-diameter offsets; (2) *anatomical relationship mapping*, probing distances, directions, and preservation of normal spatial relationships; and (3) *modality-specific landmark detection*, requiring enumeration of canonical landmarks or layers (e.g., retinal layers on OCT) under standard clinical conventions.

**Annotation Conversion.** Bounding-box annotations are turned into “locate [structure]” questions by mapping coordinates to anatomical descriptions (e.g., nasal/temporal, superior/inferior, clock-hours). Segmentation masks support OCT layer-identification, while images without explicit labels use modality-standard landmarks as references.

**Multi-Label Handling.** For images with multiple annotated structures, we generate separate AL questions per landmark plus relational questions on pairwise spatial organization; for OCT with layer-wise segmentation, we also form composite questions that require listing all visible layers in anatomical order.

Listing 2. Example template for Stage 2 AL QA pair.

```
Q (Stage 2 - AL, <MODALITY>):
  "Identify and locate the <
   ANATOMICAL_STRUCTURE> in this image."

A:
  "<PRESENT/ABSENT>.
  <SPATIAL_DESCRIPTION using clock-hour
   notation, quadrants,
   or distances in disc diameters relative
   to the fovea/optic disc.>"
```

**Stage 3: Lesion Characterization (LC).** Stage 3 describes pathological findings with standardized clinical

terms as the basis for diagnosis. We define four LC question families: (1) *lesion detection*, where the model decides whether a lesion type is present and, if so, estimates its number and coarse distribution; (2) *morphological description*, where it summarizes lesion appearance (size, shape, color/reflectivity, borders, texture, associated features); (3) *distribution pattern analysis*, where it captures spatial patterns, anatomical zones, and severity gradients; and (4) *multi-lesion composite characterization*, where it lists all pathological findings in an image and anchors them to key landmarks (e.g., arcades, macula, disc).

**Annotation Conversion.** Bounding boxes are turned into LC questions by mapping coordinates to anatomical regions (quadrants, clock-hours, disc-fovea distances) and generating brief location descriptions. Segmentation masks yield area and shape statistics that are expressed as size, shape, and location terms, while point annotations (e.g., microaneurysms) support lesion counts and clustered vs. scattered patterns. Multi-class labels give rise to either per-lesion or composite “list all findings” questions, and numeric severity scores are converted to qualitative grades (mild, moderate, severe).

**Multi-Label Handling.** For images with multiple lesion types, we use three strategies: (1) *decomposition*, generating separate single-lesion questions for fine-grained evaluation; (2) *composite integration*, asking holistic questions that require listing and structuring all visible findings in complex cases (e.g., advanced DR or AMD); and (3) *hierarchical prioritization*, focusing on vision-threatening and disease-defining lesions (e.g., neovascularization, macular edema, drusen, glaucomatous cupping) while summarizing less critical findings (e.g., scattered hemorrhages or exudates).

Listing 3. Example template for Stage 3 LC QA pair.

```
Q (Stage 3 - LC, <MODALITY>):
"Describe the morphology and
  characteristics of <LESION_TYPE>
  in this image."

A:
"Size: <SIZE or extent>.
  Shape: <SHAPE (e.g., round, irregular)>.
  Color / reflectivity: <COLOR or intensity
  pattern>.
  Borders: <BORDER definition (e.g., well/
  ill-defined)>.
  Texture: <TEXTURE (e.g., smooth, granular
  )>.
  Associated features: <RELATED FINDINGS
  (e.g., edema, hemorrhage, exudates, RPE
  changes)>."
```

**Stage 4: Disease Diagnosis (DD).** Stage 4 synthesizes anatomical (AL) and lesion-level (LC) evidence into ex-

PLICIT diagnostic conclusions. We define four DD question families: (1) *single-disease diagnosis*, where the model outputs the most likely diagnosis with brief supporting evidence; (2) *differential diagnosis ranking*, where it provides a ranked list of 2–3 candidate diseases with key discriminating features; (3) *multi-disease co-occurrence*, where it enumerates all concurrent conditions in the same image; and (4) *normal vs. abnormal assessment*, where it decides whether the image is normal and justifies this by confirming or excluding common pathologies.

**Annotation Conversion.** Single-disease labels are converted into “What is your diagnosis?” questions, with answers giving the primary diagnosis and a brief severity justification grounded in LC findings. Multi-class labels become questions that ask the model to identify all diseases present and, when needed, prioritize them by clinical urgency. Hierarchical disease codes (e.g., ICD-10) are mapped to natural-language diagnoses, while “normal” or “no DR” labels become normality-check questions (“Is this image normal or abnormal?”). Low-confidence or ambiguous labels are used to construct differential-diagnosis questions requiring a ranked list of candidates and key discriminating features.

**Consistency and Multi-Label Handling.** DD answers are required to be consistent with earlier stages: automated checks verify that each diagnosis is supported by LC-described lesions, and inconsistencies are flagged for expert review. For multi-disease cases, the model should distinguish overlapping from independent features and briefly comment on the clinical impact of co-occurrence, keeping DD aligned with the structured evidence from AL and LC.

Listing 4. Example template for Stage 4 DD QA pair

```
Q (Stage 4 - DD):
"Based on the imaging findings, what is
  the most likely diagnosis?"

A:
  Primary diagnosis: <PRIMARY DIAGNOSIS>
  Supporting evidence from LC: <EVIDENCE
  FROM LC FINDINGS>
  Differential considerations: <DIFFERENTIAL
  DIAGNOSES>
```

**Stage 5: Severity Grading (SG).** Stage 5 uses disease-specific scales to quantify progression and guide treatment. We define four SG question types: (1) *scale-based grading*, where the model applies a standard grading scale (e.g., ICDR, ROP); (2) *component-based scoring*, evaluating specific disease features (e.g., arteriolar tortuosity in ROP); (3) *progression assessment*, comparing current severity to prior images; and (4) *risk stratification*, assessing the likelihood of adverse outcomes (e.g., glaucoma progression).

**Annotation Conversion.** Source annotations are

mapped to SG questions: ordinal labels are converted to scale grading, numeric scores to clinical terms, and multi-component scores into separate assessments. Longitudinal labels are used for progression, and missing severity labels are inferred from LC findings.

Listing 5. Example template for Stage 5 SG QA pair

```
Q (Stage 5 - SG):
  "Based on current findings, assess the
   risk of [adverse outcome]."
```

```
A:
  Risk category (low/moderate/high) +
   contributing factors + recommended
   monitoring
```

### Stage 6: Clinical Decision-Making (CD).

Stage 6 applies diagnostic and severity assessments to create actionable management plans. It consists of four key question families: (1) Treatment recommendation, where the model suggests the primary intervention with rationale, alternatives, and contraindications; (2) Referral urgency, assessing how urgently a patient should be referred; (3) Monitoring strategy, recommending follow-up intervals, imaging, and clinical assessments; and (4) Contraindication assessment, evaluating risks and contraindications for the proposed treatment. Consistency Validation ensures that the CD recommendations align with the diagnosis and severity (DD-SG-CD coherence) and verifies that decisions follow clinical guidelines and include actionable details such as treatment dosing, follow-up, and escalation criteria.

Listing 6. Example template for Stage 6 CD QA pair

```
Q (Stage 6 - CD):
  "What treatment is recommended based on
   the diagnosis and severity?"
```

```
A:
  Primary intervention + rationale +
   alternative options +
   contraindications
```

## 3.2. Answer Generation and Validation Pipeline

The following outlines the detailed process for generating, validating, and ensuring quality control in the construction of diagnostic reasoning tasks in X-PCR. The process is divided into five key stages: Annotation Extraction, Template Selection, Answer Synthesis, Clinical Validation, and Quality Assurance. Each stage involves systematic tasks that ensure the accuracy, consistency, and relevance of the generated questions and answers.

### Step 1: Annotation Extraction

- Parse source dataset labels (disease, severity, bounding boxes, etc.)

- Extract metadata (patient age, imaging device, field of view)

- Identify annotation gaps requiring inference

### Step 2: Template Selection

- Map (annotation type + reasoning stage) → question template
- Prioritize templates based on annotation richness
- Generate question variations for data augmentation

### Step 3: Answer Synthesis

- For explicitly labeled data:
  - Direct mapping: Label → structured answer
  - Enrichment: Add clinical context from guidelines
- For unlabeled aspects:
  - Expert-in-the-loop annotation (for critical cases)
  - GPT-4V-based answer generation with validation
- Multi-source reconciliation (for overlapping datasets)

### Step 4: Clinical Validation

- Automated checks:
  - Anatomical plausibility (lesion locations)
  - Terminology consistency (standardized lexicon)
  - Cross-stage coherence (LC → DD → SG → CD chain)
  - Quantitative accuracy (measurements, counts)
- Expert review (board-certified ophthalmologists):
  - Sample 10% of answers per reasoning stage
  - Flag and correct errors
  - Refine answer quality guidelines
- Inter-annotator agreement:
  - Three experts independently review 500 VQA pairs
  - Cohen’s kappa  $\geq 0.85$  required for release

### Step 5: Quality Assurance

- Readability assessment (Flesch-Kincaid grade level)
- Answer length distribution analysis (avoid excessive verbosity)
- Template diversity verification (avoid repetitive phrasing)
- Adversarial filtering (remove ambiguous or misleading Q-A pairs)

The validation metrics for the X-PCR benchmark demonstrate high quality and consistency in the generated answers. The annotation consistency rate is 94.3%, with automated checks passing without the need for expert revision. Expert agreement, measured by Cohen’s K, is strong, with values of 0.87 for disease diagnosis, 0.82 for severity grading, and 0.79 for clinical decisions. Additionally, 98.1% of answers address all question components, and 96.7% of clinical decision (CD) answers align with the AAO Preferred Practice Patterns or equivalent clinical guidelines, ensuring the benchmark’s clinical relevance and reliability.

## 3.3. Distribution Across Diseases

Table 2 summarizes the disease taxonomy and per-class statistics in the X-PCR benchmark, which includes 52 distinct retinal and optic nerve conditions. The table catego-

Table 2. Disease taxonomy and per-class statistics in X-PCR.

| Index | Category | Full name                                              | Abbreviation | Images | QA Pairs |
|-------|----------|--------------------------------------------------------|--------------|--------|----------|
| 1     | DR       | No diabetic retinopathy                                | No-DR        | 1258   | 7128     |
| 2     | DR       | Mild non-proliferative diabetic retinopathy            | Mild-NPDR    | 1048   | 5940     |
| 3     | DR       | Moderate non-proliferative diabetic retinopathy        | Mod-NPDR     | 839    | 4752     |
| 4     | DR       | Severe non-proliferative diabetic retinopathy          | Sev-NPDR     | 629    | 3564     |
| 5     | DR       | Proliferative diabetic retinopathy                     | PDR          | 629    | 3564     |
| 6     | DR       | Non-center-involving diabetic macular edema            | Non-CI-DME   | 629    | 3564     |
| 7     | DR       | Center-involving diabetic macular edema                | CI-DME       | 628    | 3564     |
| 8     | DR       | Clinically significant macular edema                   | CSME         | 419    | 2376     |
| 9     | DR       | Neovascularization elsewhere secondary to DR           | NVE-DR       | 209    | 1187     |
| 10    | DR       | Neovascularization at the disc secondary to DR         | NVD-DR       | 209    | 1187     |
| 11    | DR       | Fibrotic proliferative diabetic retinopathy            | Fib-PDR      | 209    | 1187     |
| 12    | DR       | Diabetic tractional retinal detachment                 | DR-TRD       | 209    | 1187     |
| 13    | GLA      | Glaucoma suspect                                       | GLA-Sus      | 981    | 5312     |
| 14    | GLA      | Primary open-angle glaucoma, early                     | POAG-Early   | 981    | 5312     |
| 15    | GLA      | Primary open-angle glaucoma, moderate                  | POAG-Mod     | 736    | 3984     |
| 16    | GLA      | Primary open-angle glaucoma, advanced                  | POAG-Adv     | 491    | 2656     |
| 17    | GLA      | Primary angle-closure glaucoma                         | PACG         | 490    | 2656     |
| 18    | GLA      | Normal-tension glaucoma                                | NTG          | 490    | 2656     |
| 19    | GLA      | Juvenile open-angle glaucoma                           | JOAG         | 245    | 1328     |
| 20    | GLA      | Ocular hypertension                                    | OHT          | 736    | 3984     |
| 21    | CAT      | No cataract                                            | No-CAT       | 198    | 1914     |
| 22    | CAT      | Nuclear sclerotic cataract                             | NS-CAT       | 398    | 3828     |
| 23    | CAT      | Cortical cataract                                      | Cort-CAT     | 298    | 2871     |
| 24    | CAT      | Posterior subcapsular cataract                         | PSC-CAT      | 198    | 1914     |
| 25    | AMD      | Early age-related macular degeneration                 | Early-AMD    | 1187   | 8500     |
| 26    | AMD      | Intermediate age-related macular degeneration          | Int-AMD      | 949    | 6800     |
| 27    | AMD      | Neovascular age-related macular degeneration           | nAMD         | 712    | 5100     |
| 28    | AMD      | Geographic atrophy secondary to AMD                    | GA-AMD       | 474    | 3400     |
| 29    | AMD      | Retinal pigment epithelial detachment secondary to AMD | AMD-PED      | 474    | 3400     |
| 30    | AMD      | Polypoidal choroidal vasculopathy                      | PCV          | 237    | 1700     |
| 31    | AMD      | Retinal angiomatous proliferation secondary to AMD     | RAP-AMD      | 237    | 1700     |
| 32    | HTR      | Mild-to-moderate hypertensive retinopathy              | HTR-MildMod  | 936    | 8426     |
| 33    | HTR      | Severe hypertensive retinopathy                        | HTR-Sev      | 468    | 4213     |
| 34    | HTR      | Hypertensive maculopathy                               | HTR-Mac      | 233    | 2106     |
| 35    | PM       | Pathologic myopia without macular complication         | PM-NoMac     | 727    | 6520     |
| 36    | PM       | Myopic macular degeneration                            | MMD          | 546    | 4890     |
| 37    | PM       | Myopic choroidal neovascularization                    | mCNV         | 363    | 3260     |
| 38    | PM       | Myopic traction maculopathy                            | MTM          | 181    | 1630     |
| 39    | RVO      | Non-ischemic branch retinal vein occlusion             | BRVO-NI      | 977    | 7867     |
| 40    | RVO      | Ischemic branch retinal vein occlusion                 | BRVO-I       | 488    | 3933     |
| 41    | RVO      | Non-ischemic central retinal vein occlusion            | CRVO-NI      | 733    | 5901     |
| 42    | RVO      | Ischemic central retinal vein occlusion                | CRVO-I       | 488    | 3933     |
| 43    | RVO      | Venous stasis retinopathy                              | VSR          | 244    | 1966     |
| 44    | Rare     | Non-arteritic anterior ischemic optic neuropathy       | NAION        | 474    | 2424     |
| 45    | Rare     | Bilateral acute macular neuroretinopathy               | AMN          | 236    | 1212     |
| 46    | Rare     | Toxoplasmosis chorioretinitis                          | TOCR         | 356    | 1818     |
| 47    | Rare     | Tubercular multifocal choroiditis                      | TB-MC        | 356    | 1818     |
| 48    | Rare     | Multiple evanescent white dot syndrome                 | MEWDS        | 356    | 1818     |
| 49    | Rare     | Purtscher-like retinopathy                             | PLR          | 236    | 1211     |
| 50    | Rare     | Cytomegalovirus retinitis                              | CMV-Ret      | 236    | 1211     |
| 51    | Rare     | Susac syndrome                                         | Susac        | 118    | 605      |
| 52    | Rare     | Terson syndrome                                        | Terson       | 236    | 1211     |

**DR:** diabetic retinopathy; **AMD:** age-related macular degeneration; **GLA:** glaucoma; **RVO:** retinal vein occlusion; **PM:** pathological myopia; **HTR:** hypertensive retinopathy; **CAT:** cataract; **Rare:** rare retinal and optic nerve conditions.

rizes diseases into eight primary groups: diabetic retinopathy (DR), age-related macular degeneration (AMD), glaucoma (GLA), retinal vein occlusion (RVO), pathological

myopia (PM), hypertensive retinopathy (HTR), cataract (CAT), and rare conditions. Each disease class is listed with the number of images and question-answer (QA) pairs as-

sociated with it. The dataset covers a wide range of severity levels, from early stages (e.g., mild diabetic retinopathy) to advanced forms (e.g., proliferative diabetic retinopathy, macular degeneration, and various rare retinal diseases), enabling comprehensive evaluation of pathological findings and clinical decision-making.

## 4. Metrics Details

### 4.1. Difficulty Aware Metrics

We implement a three-tier grading protocol that reflects progressive clinical expertise. *Resident-level (R-level)* items probe foundational knowledge and pattern perception capability expected during the first two years of ophthalmology training. *Attending-level (A-level)* items require integration of clinical context, formulation and prioritization of differential diagnoses, and selection of appropriate management consistent with standard guidelines. *Specialist-level (S-level)* items demand subspecialty proficiency (e.g., medical retina), including recognition of uncommon subtypes, interpretation of complex multimodal patterns and evidence-based therapeutic decision-making. This stratification enables performance analyses aligned with real-world competency milestones, distinguishing surface-level pattern recognition from context-aware reasoning and subspecialty expertise.

Question difficulty was assigned via a controlled, multi-stage protocol with *small-sample, high-quality calibration*. First, on a stratified *gold set* (2% per disease–modality–stage stratum), fifteen board-certified ophthalmologists (five attending; ten specialists) independently labeled each case as *resident* (R), *attending* (A), or *specialist* (S), guided by: (i) knowledge requirements, (ii) diagnostic complexity, and (iii) decision-making nuance. Second, inter-rater reliability on the gold set was assessed using Fleiss’  $\kappa$ . Items with  $\kappa < 0.60$  underwent structured adjudication and iterative re-annotation until  $\kappa \geq 0.70$ , ensuring consistent and transparent tier construction. Third, we validated the gold-set difficulty labels against stratified human performance. Residents ( $n = 25$ ) were expected to achieve  $> 70\%$  on R-level, 40–60% on A-level, and  $< 40\%$  on S-level; attendings ( $n = 18$ )  $> 70\%$  on A-level and 50–70% on S-level; subspecialty fellows ( $n = 12$ )  $> 80\%$  on S-level. Items outside these envelopes were excluded. Fourth, calibrated by the gold set, the remaining large corpus received *provisional* difficulty labels via rule-based features, followed by periodic expert audits on 1–2% samples per stratum to control drift. Finally, because clinical utility extends beyond difficulty, each case received an *importance* score (1–5) reflecting diagnostic impact (risk of missing sight-threatening disease), treatment implications (likelihood of inappropriate management). The final weight was

$$\tilde{w}_i = \alpha \cdot \widehat{\text{Diff}}_d + (1 - \alpha) \cdot \widehat{\text{Impact}}_d, \quad (1)$$

where  $\widehat{\text{Diff}}_d \in \{1, 2, 3\}$  (R=1, A=2, S=3),  $\widehat{\text{Impact}}_d \in [1, 5]$  (importance), and  $\alpha = 0.6$  reflects expert consensus prioritizing safety-critical scenarios. This scheme integrates pedagogic difficulty with clinical consequence, yielding evaluation scores aligned with real-world practice. Let  $N$  be the number of cases and  $S=6$  be the number of reasoning stages. Denote by  $a_{i,j} \in \{0, 1\}$  the correctness of case  $j$  at stage  $i$  and by  $\mathbb{1}[\cdot]$  the indicator function.

**Stage-Wise Accuracy (SWA).** The per-stage accuracy is

$$\text{SWA}_i = \frac{1}{N} \sum_{j=1}^N a_{i,j}, \quad i \in \{1, \dots, 6\}. \quad (2)$$

**Chain Completion Rate (CCR).** The proportion of cases with all six stages correct is

$$\text{CCR} = \frac{1}{N} \sum_{j=1}^N \mathbb{1}\left[\bigwedge_{i=1}^6 (a_{i,j} = 1)\right]. \quad (3)$$

**Expertise-Stratified Accuracy (ESA).** For level  $\ell \in \{R, A, S\}$ ,

$$\text{ESA}_\ell = \frac{\text{Correct answers at level } \ell}{\text{Total questions at level } \ell}. \quad (4)$$

For each case, the model answers a six-stage chain of questions (one per stage). We evaluate under two regimes: Independent (IND), where each stage is answered in isolation with no prior-stage context; and Cascaded (CAS), where each stage consumes the model’s own prediction from the preceding stage as context.

### 4.2. Uncertainty Aware Metrics

For each case, model outputs are mapped to four confidence-aware categories: (*CC*) *Correct–Confident*: correct with confidence  $\geq 0.70$ ; (*CU*) *Correct–Uncertain*: correct with confidence  $< 0.70$ ; (*IU*) *Incorrect–Uncertain*: incorrect with confidence  $< 0.50$  (model acknowledges limits); (*IC*) *Incorrect–Confident*: incorrect with confidence  $\geq 0.50$  (overconfident error).

We score each response with a confidence-aware scheme that rewards calibration. Let  $N$  be the number of items and  $s_i$  the score for item  $i$ :

$$s_i^{\text{base}} = \begin{cases} 1.0, & \text{CC} \\ 0.7, & \text{CU} \\ 0.3, & \text{IU} \\ -0.5, & \text{IC} \end{cases} \quad (5)$$

Final Weighted UAS

$$\text{UAS} = \sum_{i=1}^N \tilde{w}_i s_i^{\text{base}} \quad (6)$$

Table 3. Evaluation of MLLMs across 6 stages on EP modality

|                    | MLLM                      | IQA   | AL    | LC    | DD    | SG    | CD    |
|--------------------|---------------------------|-------|-------|-------|-------|-------|-------|
| <i>Commercial</i>  | GPT-5 [41]                | 99.90 | 89.07 | 81.96 | 73.95 | 62.36 | 55.34 |
|                    | Gemini-2.5-Pro [12]       | 95.01 | 84.43 | 71.47 | 72.81 | 58.33 | 37.52 |
|                    | GLM-4.5v [59]             | 96.10 | 86.74 | 69.31 | 75.07 | 53.55 | 49.43 |
|                    | GPT-5-nano [42]           | 95.38 | 81.29 | 67.99 | 67.29 | 56.30 | 51.10 |
|                    | Gemini-2.5-Flash [12]     | 93.90 | 85.90 | 65.78 | 78.19 | 51.59 | 37.99 |
|                    | Claude-Haiku-4.5 [3]      | 86.91 | 85.01 | 70.33 | 70.82 | 53.46 | 49.09 |
| <i>Open-Source</i> | Qwen2.5-VL-72B [4]        | 93.92 | 82.23 | 73.13 | 67.72 | 53.98 | 47.46 |
|                    | Qwen3-VL-30B-A3B [55]     | 89.39 | 79.45 | 73.00 | 65.24 | 51.59 | 44.47 |
|                    | InternVL3-32B [50]        | 94.35 | 83.25 | 74.17 | 71.01 | 54.82 | 43.22 |
|                    | LLaVA-v1.5-13B [36]       | 56.93 | 55.55 | 49.99 | 42.13 | 32.73 | 37.58 |
|                    | qwen3-VL-8B [55]          | 89.53 | 70.10 | 79.66 | 73.74 | 50.60 | 41.08 |
|                    | Qwen2.5-VL-7B [4]         | 85.55 | 66.12 | 75.68 | 69.76 | 46.62 | 37.10 |
|                    | LLaMA3-LLaVA-Next-8B [31] | 69.99 | 61.24 | 79.44 | 47.60 | 44.86 | 38.27 |
|                    | InternVL3-8B [50]         | 87.57 | 73.97 | 69.42 | 65.53 | 53.91 | 37.22 |
|                    | ShareGPT4V-7B [7]         | 72.43 | 69.24 | 58.99 | 50.66 | 38.03 | 38.31 |
| LLaVA-v1.5-7B [36] | 59.39                     | 62.24 | 55.59 | 44.66 | 28.82 | 32.73 |       |
| <i>Medical</i>     | MedGemma-27B-IT [49]      | 92.72 | 74.60 | 74.44 | 66.19 | 48.34 | 46.67 |
|                    | HuaTuoGPT-Vision-34B [6]  | 75.94 | 66.01 | 55.56 | 58.48 | 47.59 | 40.64 |
|                    | Lingshu-7B [56]           | 77.01 | 63.33 | 70.19 | 64.49 | 47.49 | 31.39 |
|                    | LLaVA-Med-7B [30]         | 49.36 | 36.03 | 53.84 | 44.74 | 20.00 | 26.28 |
|                    | HuaTuoGPT-Vision-7B [6]   | 60.22 | 54.69 | 46.63 | 57.48 | 42.88 | 35.02 |

This formulation incentivizes appropriate calibration: models should express high confidence when correct (especially on R-level items) and low confidence when uncertain (particularly on ambiguous S-level items).

We assess calibration using three complementary measures in a unified formulation. The *Expected Calibration Error (ECE)* aggregates bin-wise confidence accuracy gaps: letting  $\{B_m\}_{m=1}^M$  be confidence bins (e.g.,  $[0, 0.25), \dots, [0.75, 1.0]$ ) with  $\text{acc}(B_m)$  and  $\text{conf}(B_m)$  denoting average accuracy and confidence, respectively,

$$\text{ECE} = \sum_{m=1}^M \frac{|B_m|}{N} |\text{acc}(B_m) - \text{conf}(B_m)|. \quad (7)$$

For each response, we require the model to report its confidence (“Please rate your confidence from 0 to 100%”). We parse this as a percentage and normalize it to the  $[0, 1]$  range, clipping out-of-range values to that interval. The resulting confidences are then used in the uncertainty-aware scoring and calibration metrics described in Eq. (7).

## 5. Detailed Experimental Results

In the main manuscript, we have presented the evaluation results across six modalities combined. To further supplement these findings, we provide individual modality results across six distinct stages in subsequent subsections.

### 5.1. Results on EP Modality

Tab. 3 exhibits a step-wise degradation on the EP modality: most models achieve high accuracy on Image Quality Assessment (IQA) and basic Anatomical Localization (AL), indicating that “seeing clearly and localizing the region of interest” is largely solved using external photography; from from Lesion Characterization (LC) to Disease Diagnosis

Table 4. Evaluation of MLLMs across 6 stages on CFP modality

|                    | MLLM                      | IQA   | AL     | LC    | DD    | SG    | CD    |
|--------------------|---------------------------|-------|--------|-------|-------|-------|-------|
| <i>Commercial</i>  | GPT-5 [41]                | 99.80 | 98.65  | 90.78 | 81.91 | 69.07 | 61.30 |
|                    | Gemini-2.5-Pro [12]       | 99.96 | 97.53  | 82.56 | 84.11 | 67.39 | 43.34 |
|                    | GLM-4.5v [59]             | 99.91 | 97.19  | 77.66 | 84.12 | 60.01 | 55.38 |
|                    | GPT-5-nano [42]           | 99.97 | 98.13  | 82.06 | 81.22 | 67.95 | 61.68 |
|                    | Gemini-2.5-Flash [12]     | 99.82 | 100.00 | 78.21 | 92.97 | 61.34 | 45.17 |
|                    | Claude-Haiku-4.5 [3]      | 94.45 | 92.39  | 76.43 | 76.97 | 58.10 | 53.35 |
| <i>Open-Source</i> | Qwen2.5-VL-72B [4]        | 99.78 | 93.13  | 82.82 | 76.69 | 61.13 | 53.75 |
|                    | Qwen3-VL-30B-A3B [55]     | 99.88 | 93.09  | 85.53 | 76.44 | 60.44 | 52.10 |
|                    | InternVL3-32B [50]        | 94.35 | 83.25  | 74.17 | 71.01 | 54.82 | 43.22 |
|                    | LLaVA-v1.5-13B [36]       | 60.02 | 58.57  | 52.71 | 44.42 | 34.51 | 39.62 |
|                    | qwen3-VL-8B [55]          | 99.70 | 86.20  | 97.88 | 90.65 | 61.54 | 50.81 |
|                    | Qwen2.5-VL-7B [4]         | 99.86 | 80.82  | 92.50 | 85.27 | 56.98 | 45.35 |
|                    | LLaMA3-LLaVA-Next-8B [31] | 61.06 | 53.43  | 69.30 | 41.53 | 39.14 | 33.39 |
|                    | InternVL3-8B [50]         | 87.57 | 73.97  | 69.42 | 65.53 | 53.91 | 37.22 |
|                    | ShareGPT4V-7B [7]         | 65.34 | 62.47  | 53.22 | 45.71 | 34.31 | 34.56 |
| LLaVA-v1.5-7B [36] | 51.79                     | 54.27 | 48.47  | 38.94 | 25.13 | 28.54 |       |
| <i>Medical</i>     | MedGemma-27B-IT [49]      | 99.89 | 89.37  | 89.17 | 79.29 | 57.91 | 55.91 |
|                    | HuaTuoGPT-Vision-34B [6]  | 75.94 | 66.01  | 55.56 | 58.48 | 47.59 | 40.64 |
|                    | Lingshu-7B [56]           | 99.87 | 82.93  | 91.92 | 84.45 | 62.19 | 41.10 |
|                    | LLaVA-Med-7B [30]         | 78.61 | 57.39  | 85.75 | 71.26 | 31.80 | 41.85 |
|                    | HuaTuoGPT-Vision-7B [6]   | 74.86 | 69.33  | 61.27 | 72.12 | 57.52 | 49.66 |

(DD), performance drops substantially and gaps between commercial, open-source, and medical-specialized models become more pronounced, showing that inferring a concrete diagnosis from EP alone remains unstable. At the Severity Grading (SG) and Clinical Decision (CD) stages, accuracies fall further into the mid-to-low range, with MedGemma-27B-IT [49] and HuaTuoGPT [6] offering only modest gains. Overall, current MLLMs can provide reliable basic readability and structural localization using external photography, but they still struggle with higher-level clinical reasoning that requires integrating severity, disease course, and management strategies, functioning more as visual aids than autonomous decision makers.

### 5.2. Results on CFP Modality

Tab. 4 reports six-stage performance on the CFP modality and reveals a clear high-to-low pattern. Most models are nearly saturated on image quality assessment and basic anatomical localization, indicating that tasks of “seeing clearly and finding the right structure” are no longer challenging for CFP. However, accuracies drop markedly from lesion characterization to disease diagnosis, and the gaps between models become more pronounced, suggesting that the transition from merely spotting lesions to assigning a specific diagnosis forms the first major bottleneck. In the severity grading and clinical decision stages, performance further declines to roughly the 40–60% range, with medical-specialized models only slightly outperforming general MLLMs. This pattern shows that while current MLLMs can perform reliable visual recognition on CFP, they still struggle to produce guideline-consistent grading and downstream management decisions when relying on this single modality.

Table 5. Evaluation of MLLMs across 6 stages on RetCam modality.

|                    | MLLM                      | IQA   | AL    | LC    | DD    | SG    | CD    |
|--------------------|---------------------------|-------|-------|-------|-------|-------|-------|
| <i>Commercial</i>  | GPT-5 [41]                | 97.65 | 86.94 | 80.00 | 72.19 | 60.87 | 54.02 |
|                    | Gemini-2.5-Pro [12]       | 89.30 | 79.36 | 67.18 | 68.44 | 54.83 | 35.27 |
|                    | GLM-4.5v [59]             | 95.44 | 86.14 | 68.84 | 74.56 | 53.19 | 49.09 |
|                    | GPT-5-nano [42]           | 87.83 | 74.86 | 62.61 | 61.96 | 51.84 | 47.06 |
|                    | Gemini-2.5-Flash [12]     | 72.51 | 66.34 | 50.79 | 60.38 | 39.84 | 29.33 |
|                    | Claude-Haiku-4.5 [3]      | 57.41 | 56.16 | 46.46 | 46.78 | 35.32 | 32.43 |
| <i>Open-Source</i> | Qwen2.5-VL-72B [4]        | 92.95 | 81.38 | 72.37 | 67.02 | 53.42 | 46.97 |
|                    | Qwen3-VL-30B-A3B [55]     | 96.09 | 85.41 | 78.48 | 70.13 | 55.46 | 47.80 |
|                    | InternVL3-32B [50]        | 94.35 | 83.25 | 74.17 | 71.01 | 54.82 | 43.22 |
|                    | LLaVA-v1.5-13B [36]       | 80.93 | 78.98 | 71.07 | 59.90 | 46.53 | 53.43 |
|                    | qwen3-VL-8B [55]          | 86.17 | 65.60 | 75.72 | 69.45 | 46.10 | 36.02 |
|                    | Qwen2.5-VL-7B [4]         | 90.60 | 70.03 | 80.15 | 73.88 | 49.37 | 39.29 |
|                    | LLaMA3-LLaVA-Next-8B [31] | 72.09 | 63.08 | 81.83 | 49.03 | 46.21 | 39.42 |
|                    | InternVL3-8B [50]         | 87.57 | 73.97 | 69.42 | 65.53 | 53.91 | 37.22 |
|                    | ShareGPT4V-7B [7]         | 78.26 | 74.82 | 63.74 | 54.75 | 41.10 | 41.39 |
|                    | LLaVA-v1.5-7B [36]        | 80.24 | 84.09 | 75.10 | 60.34 | 38.94 | 44.22 |
| <i>Medical</i>     | MedGemma-27B-IT [49]      | 88.92 | 71.55 | 71.39 | 63.48 | 46.36 | 44.76 |
|                    | HuaTuoGPT-Vision-34B [6]  | 75.94 | 66.01 | 55.56 | 58.48 | 47.59 | 40.64 |
|                    | Lingshu-7B [56]           | 85.53 | 70.34 | 77.96 | 71.62 | 52.74 | 34.86 |
|                    | LLaVA-Med-7B [30]         | 45.06 | 32.90 | 49.15 | 40.85 | 20.00 | 23.99 |
|                    | HuaTuoGPT-Vision-7B [6]   | 70.50 | 64.97 | 56.91 | 67.76 | 53.16 | 45.30 |

### 5.3. Results on RetCam Modality

On the RetCam modality, Tab. 5 shows the same six-stage “high-to-low” gradient: most models remain strong on IQA and AL (commercial systems often above 90–95%), indicating that assessing image readability and coarse structural localization on wide-field pediatric fundus images is largely solved; however, performance consistently drops from LC to DD, SG, and CD. Even the best models (GPT-5 [41], Qwen2.5-VL-72B [4], MedGemma-27B-IT [49]) only reach about 60–70% on DD, with SG/CD typically falling into the 40–60% band, and while some open-source or medical models achieve relatively high LC scores, their advantages shrink at staging and decision levels. Overall, RetCam is clearly more challenging than CFP/EP: current MLLMs can detect and localize lesions reasonably well, but still struggle to deliver stable, guideline-aligned diagnosis, grading, and management decisions, behaving more like pattern spotters than reliable agents for structured ROP-style clinical reasoning.

### 5.4. Results on FFA Modality

In Tab. 6, the FFA modality exhibits a similar “high-to-low” six-stage staircase: leading commercial models achieve very high scores on IQA and AL (mostly above 80–95%), suggesting that overall image quality assessment and coarse anatomical localization on FFA are largely solved; performance then drops into the 60–70% band for LC and DD, especially for open-source and medical-specialized models, indicating that stably recognizing leakage patterns and non-perfusion across phases and mapping them to correct diagnoses remains challenging; by the SG and CD stages, most models fall to roughly 40–60%, with medical models only modestly better, highlighting that current MLLMs can “see

Table 6. Evaluation of MLLMs across 6 stages on FFA modality.

|                    | MLLM                      | IQA   | AL    | LC    | DD    | SG    | CD    |
|--------------------|---------------------------|-------|-------|-------|-------|-------|-------|
| <i>Commercial</i>  | GPT-5 [41]                | 96.71 | 82.54 | 75.95 | 68.54 | 57.79 | 51.29 |
|                    | Gemini-2.5-Pro [12]       | 97.08 | 86.27 | 73.03 | 74.39 | 59.60 | 38.34 |
|                    | GLM-4.5v [59]             | 86.74 | 78.29 | 62.56 | 67.77 | 48.34 | 44.62 |
|                    | GPT-5-nano [42]           | 82.68 | 70.48 | 58.94 | 58.33 | 48.80 | 44.30 |
|                    | Gemini-2.5-Flash [12]     | 95.37 | 87.25 | 66.81 | 79.42 | 52.40 | 38.58 |
|                    | Claude-Haiku-4.5 [3]      | 75.02 | 73.39 | 60.71 | 61.14 | 46.15 | 42.38 |
| <i>Open-Source</i> | Qwen2.5-VL-72B [4]        | 91.36 | 79.99 | 71.13 | 65.88 | 52.50 | 46.17 |
|                    | Qwen3-VL-30B-A3B [55]     | 82.46 | 73.29 | 67.34 | 60.18 | 47.59 | 41.02 |
|                    | InternVL3-32B [50]        | 94.35 | 83.25 | 74.17 | 71.01 | 54.82 | 43.22 |
|                    | LLaVA-v1.5-13B [36]       | 47.59 | 46.44 | 41.79 | 35.22 | 27.36 | 31.41 |
|                    | qwen3-VL-8B [55]          | 84.39 | 65.73 | 74.91 | 69.23 | 46.99 | 37.84 |
|                    | Qwen2.5-VL-7B [4]         | 82.20 | 63.54 | 72.72 | 67.04 | 44.80 | 35.65 |
|                    | LLaMA3-LLaVA-Next-8B [31] | 65.41 | 57.24 | 74.25 | 44.49 | 41.93 | 35.77 |
|                    | InternVL3-8B [50]         | 87.57 | 73.97 | 69.42 | 65.53 | 53.91 | 37.22 |
|                    | ShareGPT4V-7B [7]         | 58.74 | 56.16 | 47.84 | 41.09 | 30.84 | 31.07 |
|                    | LLaVA-v1.5-7B [36]        | 51.85 | 54.34 | 48.53 | 38.99 | 25.16 | 28.58 |
| <i>Medical</i>     | MedGemma-27B-IT [49]      | 79.34 | 63.84 | 63.70 | 56.64 | 41.37 | 39.94 |
|                    | HuaTuoGPT-Vision-34B [6]  | 75.94 | 66.01 | 55.56 | 58.48 | 47.59 | 40.64 |
|                    | Lingshu-7B [56]           | 75.27 | 61.90 | 68.60 | 63.03 | 46.42 | 30.68 |
|                    | LLaVA-Med-7B [30]         | 40.78 | 29.77 | 44.48 | 36.97 | 20.00 | 21.71 |
|                    | HuaTuoGPT-Vision-7B [6]   | 51.51 | 45.98 | 37.92 | 48.77 | 34.17 | 26.31 |

Table 7. Evaluation of MLLMs across 6 stages on ICGA modality.

|                    | MLLM                      | IQA   | AL    | LC    | DD    | SG    | CD    |
|--------------------|---------------------------|-------|-------|-------|-------|-------|-------|
| <i>Commercial</i>  | GPT-5 [41]                | 98.71 | 82.54 | 75.95 | 68.54 | 57.79 | 51.29 |
|                    | Gemini-2.5-Pro [12]       | 97.08 | 86.27 | 73.03 | 74.39 | 59.60 | 38.34 |
|                    | GLM-4.5v [59]             | 86.74 | 78.29 | 62.56 | 67.77 | 48.34 | 44.62 |
|                    | GPT-5-nano [42]           | 82.68 | 70.48 | 58.94 | 58.33 | 48.80 | 44.30 |
|                    | Gemini-2.5-Flash [12]     | 95.37 | 87.25 | 66.81 | 79.42 | 52.40 | 38.58 |
|                    | Claude-Haiku-4.5 [3]      | 75.02 | 73.39 | 60.71 | 61.14 | 46.15 | 42.38 |
| <i>Open-Source</i> | Qwen2.5-VL-72B [4]        | 89.99 | 78.79 | 70.07 | 64.89 | 51.72 | 45.47 |
|                    | Qwen3-VL-30B-A3B [55]     | 79.85 | 70.97 | 65.21 | 58.28 | 46.08 | 39.72 |
|                    | InternVL3-32B [50]        | 94.35 | 83.25 | 74.17 | 71.01 | 54.82 | 43.22 |
|                    | LLaVA-v1.5-13B [36]       | 48.93 | 47.75 | 42.96 | 36.21 | 28.13 | 32.30 |
|                    | qwen3-VL-8B [55]          | 83.44 | 65.09 | 74.12 | 68.53 | 46.67 | 37.68 |
|                    | Qwen2.5-VL-7B [4]         | 80.79 | 62.44 | 71.47 | 65.88 | 44.02 | 35.03 |
|                    | LLaMA3-LLaVA-Next-8B [31] | 62.45 | 54.64 | 70.88 | 42.47 | 40.03 | 34.15 |
|                    | InternVL3-8B [50]         | 87.57 | 73.97 | 69.42 | 65.53 | 53.91 | 37.22 |
|                    | ShareGPT4V-7B [7]         | 58.78 | 56.19 | 47.88 | 41.12 | 30.87 | 31.09 |
|                    | LLaVA-v1.5-7B [36]        | 51.70 | 54.18 | 48.39 | 38.88 | 25.09 | 28.49 |
| <i>Medical</i>     | MedGemma-27B-IT [49]      | 80.21 | 64.54 | 64.40 | 57.26 | 41.82 | 40.38 |
|                    | HuaTuoGPT-Vision-34B [6]  | 75.94 | 66.01 | 55.56 | 58.48 | 47.59 | 40.64 |
|                    | Lingshu-7B [56]           | 74.68 | 61.42 | 68.07 | 62.54 | 46.05 | 30.44 |
|                    | LLaVA-Med-7B [30]         | 40.75 | 29.75 | 44.45 | 36.94 | 20.00 | 21.70 |
|                    | HuaTuoGPT-Vision-7B [6]   | 51.52 | 45.99 | 37.93 | 48.78 | 34.18 | 26.32 |

where is bright or dark” but still struggle to translate multi-phase perfusion patterns and lesion extent into guideline-consistent staging and management, making the full chain from lesion detection to hemodynamic understanding and decision-making particularly weak on FFA.

### 5.5. Results on ICGA Modality

Tab. 7 shows a similar six-stage “degrading” pattern on ICGA: most models maintain high performance on IQA and AL (commercial models often in the 80–95% range), indicating that assessing angiogram quality and roughly localizing abnormal regions is largely solved; however, accuracy drops steadily from LC to DD and further to SG and CD, with staging/decision performance frequently falling into the 40–60% band or below, and open-source or medical-specialized models offering only modest gains over strong

Table 8. Evaluation of MLLMs across 6 stages on OCT modality.

|                    | MLLM                      | IQA   | AL    | LC    | DD    | SG    | CD    |
|--------------------|---------------------------|-------|-------|-------|-------|-------|-------|
| <i>Commercial</i>  | GPT-5 [41]                | 97.81 | 63.30 | 58.25 | 52.56 | 40.32 | 30.33 |
|                    | Gemini-2.5-Pro [12]       | 89.52 | 61.78 | 52.30 | 53.28 | 32.68 | 27.45 |
|                    | GLM-4.5v [59]             | 51.34 | 46.34 | 37.03 | 40.11 | 28.61 | 26.41 |
|                    | GPT-5-nano [42]           | 67.67 | 57.68 | 48.24 | 47.74 | 39.94 | 36.26 |
|                    | Gemini-2.5-Flash [12]     | 65.36 | 59.79 | 45.78 | 54.43 | 35.91 | 26.44 |
|                    | Claude-Haiku-4.5 [3]      | 59.53 | 58.23 | 48.18 | 48.51 | 36.62 | 33.63 |
| <i>Open-Source</i> | Qwen2.5-VL-72B [4]        | 60.55 | 53.01 | 47.14 | 43.66 | 34.80 | 30.60 |
|                    | Qwen3-VL-30B-A3B [55]     | 61.00 | 54.22 | 49.82 | 44.52 | 35.20 | 30.34 |
|                    | InternVL3-32B [50]        | 84.35 | 53.25 | 54.17 | 41.01 | 38.82 | 23.22 |
|                    | LLaVA-v1.5-13B [36]       | 33.75 | 32.93 | 29.63 | 24.98 | 20.00 | 22.28 |
|                    | qwen3-VL-8B [55]          | 56.10 | 43.36 | 49.63 | 45.75 | 30.57 | 24.33 |
|                    | Qwen2.5-VL-7B [4]         | 56.10 | 43.36 | 49.63 | 45.75 | 30.57 | 24.33 |
|                    | LLaMA3-LLaVA-Next-8B [31] | 46.40 | 40.60 | 52.66 | 31.55 | 29.74 | 25.37 |
|                    | InternVL3-8B [50]         | 87.57 | 73.97 | 69.42 | 65.53 | 53.91 | 37.22 |
|                    | ShareGPT4V-7B [7]         | 40.87 | 39.08 | 33.29 | 28.59 | 21.46 | 21.62 |
|                    | LLaVA-v1.5-7B [36]        | 39.60 | 41.50 | 37.07 | 29.78 | 20.00 | 21.83 |
| <i>Medical</i>     | MedGemma-27B-IT [49]      | 60.59 | 48.75 | 48.65 | 43.26 | 31.59 | 30.50 |
|                    | HuaTuoGPT-Vision-34B [6]  | 75.94 | 66.01 | 55.56 | 58.48 | 47.59 | 40.64 |
|                    | Lingshu-7B [56]           | 51.18 | 42.09 | 46.65 | 42.86 | 31.56 | 20.86 |
|                    | LLaVA-Med-7B [30]         | 28.25 | 20.62 | 30.81 | 25.61 | 20.00 | 20.00 |
|                    | HuaTuoGPT-Vision-7B [6]   | 48.07 | 42.54 | 34.48 | 45.33 | 30.73 | 22.87 |

commercial baselines. Given that ICGA is crucial for differentiating entities such as PCV and AMD subtypes, this “can see and localize, but cannot reliably subtype or manage” behavior suggests that current MLLMs can exploit ICGA for lesion recognition and coarse diagnosis, but still struggle to integrate temporal phase patterns and subtle choroidal vascular signatures into guideline-consistent staging and treatment planning.

## 5.6. Results on OCT Modality

Tab. 8 indicates that OCT is arguably the toughest modality for all models: while top commercial systems (e.g., GPT-5 [41]) still achieve near-ceiling performance on IQA, accuracy drops sharply from AL onward, with LC and DD typically hovering around the 40–50% range and SG/CD further collapsing into the low 30–40% band; most open-source and even medical-specialized models perform at or below this level. Unlike the smoother “high-to-low” pattern seen on CFP/EP, OCT exhibits a consistently low profile across all six stages, suggesting that current MLLMs remain weak at modeling layered retinal microstructures, subtle reflectivity changes, and quasi-3D context: they can roughly “see” the B-scan, but struggle to complete the full chain from structural parsing and lesion characterization to diagnosis, staging, and management, making OCT-centric diseases such as DME or nAMD far from being reliably handled in an end-to-end fashion by present models.

## 5.7. Analysis of Single-Modality Findings

A comprehensive analysis of model performance across six ophthalmic imaging modalities (EP, CFP, RetCam, OCT, FFA, ICGA) reveals a consistent and pronounced performance degradation as task complexity increases from basic image interpretation to advanced clinical reasoning. The

following key findings emerge:

**Consistent Performance Decline from IQA to DD Spanning Six Modalities.** All modalities exhibit a “high-to-low” performance gradient across the six-stage clinical reasoning chain. Models achieve near-saturation performance on IQA and AL, indicating that foundational visual recognition capabilities are largely solved. However, a significant and consistent accuracy drop occurs from LC to DD, which represents the first major bottleneck. Performance further declines at SG and CD, with accuracies often falling into the 40–60% range, demonstrating a fundamental limitation in higher-order clinical reasoning.

**Limitations of Monomodal Diagnosis.** The steep decline in performance underscores the inherent limitations of single-modality analysis. While models function effectively as “pattern spotters” for basic tasks, they struggle to integrate the contextual, temporal, and structural subtleties required for guideline consistent diagnosis and management. This gap is most acute for complex modalities like FFA, ICGA, and OCT, where interpreting dynamic sequences (FFA, ICGA) or 3D structural relationships (OCT) remains a substantial challenge. Consequently, current MLLMs act more as visual aids than autonomous diagnostic agents when limited to a single data source.

**Modality-Specific Difficulty Hierarchy.** A clear hierarchy of modality difficulty is observed. EP and CFP are relatively easier, with models maintaining reasonable performance through LC. RetCam introduces wider-field complexity, while FFA and ICGA present challenges in interpreting temporal and hemodynamic patterns. OCT is unequivocally the most challenging modality, with performance collapsing early at AL and remaining low across all subsequent stages, highlighting a significant weakness in modeling layered retinal microstructures and quasi-3D context.

**Marginal Gains from Medical Specialization.** The performance advantage of medical-specialized models over strong generalist MLLMs is often modest and diminishes at higher reasoning stages (SG, CD). While these models sometimes show improvements in intermediate tasks like LC, they fail to demonstrate a decisive edge in complex diagnostic and decision-making tasks, indicating that current medical fine-tuning approaches are insufficient for instilling deep clinical reasoning capabilities.

## 6. Case Studies

### 6.1. Case Study of Six-Stage Clinical Reasoning Chain

Fig. 3 presents a case study of our six-stage clinical reasoning chain on an eye photograph with severe central lens opacity. The chain mirrors real clinical workflow: the model first evaluates image quality (Stage 1, IQA), local-

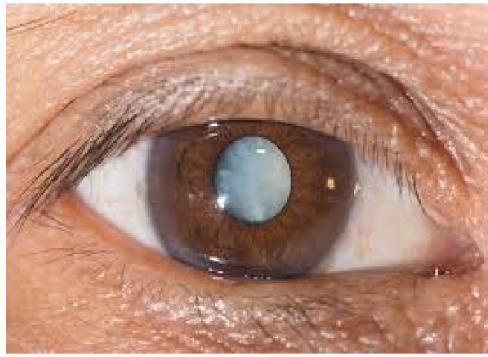

**IQA.** Is this external eye photograph of sufficient quality for clinical assessment?

- A. Yes, clearly visible.
- B. No, too blurred.
- C. No, severe shadowing.
- D. No, overexposure.

GPT-5 A ✓ medgemma A ✓ Qwen3 A ✓

**AL.** Which anatomical structure is primarily abnormal in this image?

- A. Corneal leukoma.
- B. Lens opacity.
- C. Conjunctival mass.
- D. Iris coloboma.

GPT-5 B ✓ medgemma B ✓ Qwen3 B ✓

**LC.** Which description best matches the main lesion in this image?

- A. Dense, centrally located white lens opacity.
- B. Fine superficial punctate staining of the corneal epithelium.
- C. Yellowish subretinal deposits clustered in the macular region.
- D. Sectoral iris atrophy with transillumination defects.

GPT-5 A ✓ medgemma A ✓ Qwen3 B ✗

**DD.** Based on the lesion description, what is the most likely diagnosis?

- A. Central corneal scar following infectious keratitis.
- B. Acute angle-closure glaucoma with corneal edema.
- C. Mature cataract in the affected eye.
- D. Endophthalmitis with hypopyon formation.

GPT-5 C ✓ medgemma A ✗ Qwen3 B ✗

**SG.** How would you grade this cataract?

- A. No cataract.
- B. Mild cataract with minimal lens opacities and a clear red reflex.
- C. Moderate cataract with partial obscuration of the red reflex.
- D. Severe / mature cataract with near-complete loss of the red reflex.

GPT-5 D ✓ medgemma A ✗ Qwen3 A ✗

**CD.** What is the most appropriate management for this eye?

- A. Definitive surgical treatment. (Correct)
- B. Start topical lubricating drops only.
- C. Prescribe topical antibiotic eye drops.
- D. No intervention.

GPT-5 A ✓ medgemma D ✗ Qwen3 B ✗

Figure 3. Case study of six-stage clinical reasoning chain. X-PCR serves as a unified benchmark for bridging task-specific performance and comprehensive diagnostic reasoning in MLLMs, via aligned multi-modal data across six stages.

izes the abnormality to the lens (Stage 2, AL), describes it as a dense central white opacity (Stage 3, LC), integrates these findings into a mature cataract diagnosis (Stage 4, DD), grades it as severe with near-complete loss of red reflex (Stage 5, SG), and finally recommends definitive surgical treatment (Stage 6, CD). GPT-5 completes all six stages, while Qwen3 performs well only on the earlier perception and localization stages (IQA, AL) but fails on higher-level diagnostic and management stages (LC–CD). MedGemina and Qwen3 both break down once diagnostic synthesis and treatment planning are required. This pattern, consistent performance across models in early stages and divergence in later stages, shows that our six-stage design faithfully captures clinical reasoning and exposes where different models fail, rather than obscuring these weaknesses with a single end-point accuracy metric.

## 6.2. Case Study of Cross-Modality Clinical Reasoning

Fig. 4 presents a case study of cross-modality clinical reasoning in a patient with polypoidal choroidal vasculopa-

thy (PCV) in the right eye. The color fundus photograph (CFP) of the affected eye shows an orange-red subfoveal lesion with surrounding hard exudates and macular edema, while the fellow eye appears relatively normal. On fluorescein angiography (FFA), the corresponding lesion manifests as a temporal focal hyperfluorescent spot with late diffuse leakage and serous detachment, and OCT reveals subretinal hyper-reflective material with overlying intraretinal and subretinal fluid.

We cast this case into three cross-modal reasoning tasks. Correspondence Identification (Q1) asks the model to match the macular lesion on CFP with its FFA counterpart, testing precise spatial and semantic alignment. Diagnostic Integration (Q2) requires jointly interpreting CFP, FFA, and clinical context to favor PCV over mimics such as center-involving DME or neovascular AMD. Modality Selection (Q3) evaluates value-of-information reasoning by asking which further test is most useful; the correct choice is ICGA, the gold standard for confirming polypoidal lesions and branching vascular networks.

Despite their strong overall performance, all three mod-

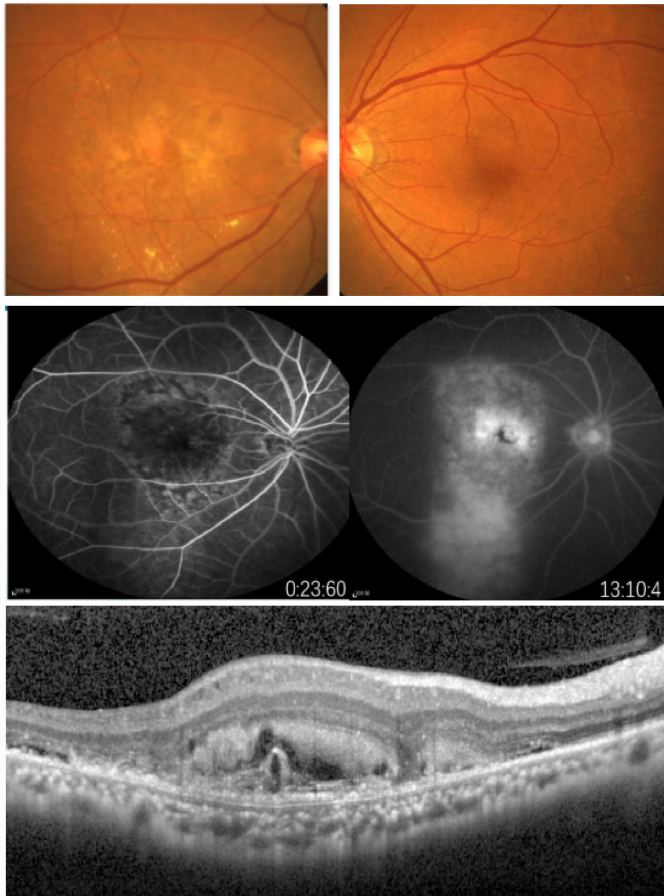

### ● Correspondence Identification

**Q1.** In the CFP of the right eye, an orange-red subfoveal lesion with hard exudates and macular edema is seen. Which area on the FFA corresponds to this lesion?

- A. The temporal focal hyperfluorescent spot with late diffuse leakage and serous detachment.
- B. The hypofluorescent halo around the optic disc without leakage.
- C. A small area of blocked fluorescence in the far nasal periphery.
- D. A normal-appearing foveal avascular zone without leakage.

GPT-5 C × medgenma C × Qwen3 B ×

### ● Diagnostic Integration

**Q2.** Considering the CFP, FFA, and ICGA findings together, what is the most likely diagnosis in the right eye?

- A. Center-involving diabetic macular edema.
- B. Neovascular age-related macular degeneration.
- C. Polypoidal choroidal vasculopathy (PCV).
- D. Central serous chorioretinopathy.

GPT-5 B × medgenma A × Qwen3 B ×

### ● Modality Selection

**Q3.** Besides CFP and FFA, which additional imaging modality is most helpful in making a diagnosis?

- A. Standard automated perimetry to assess visual field defects.
- B. B-scan ocular ultrasonography of the posterior segment.
- C. Fundus autofluorescence imaging of the macula.
- D. Indocyanine green angiography (ICGA).

GPT-5 D ✓ medgenma B × Qwen3 B ×

Figure 4. Case study of cross-modality clinical reasoning. We cast this case into three cross-modal reasoning tasks: matching CFP-FFA lesions through Correspondence Identification (Q1), integrating multi-modal data to differentiate PCV from mimics through Diagnostic Integration (Q2), and selecting ICGA as the definitive next test through Modality Selection (Q3).

els fail on Q1 and Q2, misaligning CFP and FFA findings and converging on incorrect diagnoses, while only GPT-5 correctly selects ICGA in Q3. This case study shows that our cross-modality tasks expose failures that would be invisible in single-modality or single-step diagnosis settings: models can describe individual images reasonably well, yet break down when required to align evidence across modalities and use it to drive diagnosis and imaging decisions. Consequently, this design demonstrates the necessity and utility of structured cross-modal reasoning benchmarks like X-PCR for realistically assessing and improving ophthalmic MLLMs.

## References

- [1] S. O. Afolabi, D. K. Hwang, F. A. Medeiros, et al. Equity-enhanced glaucoma progression prediction from multimodal clinical data using a fairness-aware deep learning framework. *npj Digital Medicine*, 8, 2025. Introduces and uses the Harvard-GDP glaucoma progression dataset. 2
- [2] Ankita Agrawal, Priyanka Kokil, Rahul Phalak, and et

- al. Hvdropsdb: A multi-structure segmentation dataset for retinopathy of prematurity. *Scientific Data*, 10:595, 2023. 2
- [3] Anthropic. Introducing claude haiku 4.5, 2025. Model announcement and overview. 11, 12, 13
- [4] Shuai Bai, Keqin Chen, Xuejing Liu, Jialin Wang, Wenbin Ge, Sibao Song, Kai Dang, Peng Wang, Shijie Wang, Jun Tang, Humen Zhong, Yuanzhi Zhu, Mingkun Yang, Zhaohai Li, Jianqiang Wan, Pengfei Wang, Wei Ding, Zheren Fu, Yiheng Xu, Jiabo Ye, Xi Zhang, Tianbao Xie, Zesen Cheng, Hang Zhang, Zhibo Yang, Haiyang Xu, and Junyang Lin. Qwen2.5-vl technical report. *arXiv preprint arXiv:2502.13923*, 2025. 11, 12, 13
- [5] Joint Shantou International Eye Center. 1000 fundus images with 39 categories (jsiec retinal-39). <https://www.kaggle.com/datasets/jr2ngb/retinal-disease-classification>, 2021. Accessed 2025-11-15. 2
- [6] Junying Chen, Chi Gui, Ruyi Ouyang, Anningzhe Gao, Shunian Chen, Guiming Hardy Chen, Xidong Wang, Ruifei Zhang, Zhenyang Cai, Ke Ji, et al. Huatuogpt-vision, towards injecting medical visual knowledge into multimodal

- llms at scale. *arXiv preprint arXiv:2406.19280*, 2024. 11, 12, 13
- [7] Lin Chen, Jinsong Li, Xiaoyi Dong, Pan Zhang, Conghui He, Jiaqi Wang, Feng Zhao, and Dahua Lin. Sharegpt4v: Improving large multi-modal models with better captions. In *European Conference on Computer Vision (ECCV)*, 2024. 11, 12, 13
- [8] Xin Chen, Jing Wang, Qiang Li, and et al. Maples-dr: A multi-attribute pathology lesion segmentation dataset for diabetic retinopathy. *arXiv preprint*, arXiv:2403.XXXXX, 2024. 2
- [9] Kaggle Community. Eyepacs/eyephotos fundus image collection. <https://www.kaggle.com/datasets/jeanpat/eyepacs-eye-photos>, 2019. Accessed 2025-11-15. 2
- [10] C. De Vente, M. Wang, L. R aber, J. Schouten, B. van Ginneken, et al. Airos: Artificial intelligence for robust glaucoma screening challenge. *IEEE Transactions on Medical Imaging*, 43(1):542–554, 2024. 2
- [11] Etienne Decenciere, Xiwei Zhang, Guy Cazuguel, Bruno Lay, B atrice Cochener, Caroline Trone, Philippe Gain, Richard Ordonez, Pascale Massin, Ali Erginay, B atrice Charton, and Jean-Claude Klein. Feedback on a publicly distributed image database: The messidor database. *Image Analysis & Stereology*, 33(3):231–234, 2014. 2
- [12] Google DeepMind. Gemini 1.5: Scaling up multimodal reasoning, 2024. <https://deepmind.google/technologies/gemini/>. 11, 12, 13
- [13] Lijie Deng, Jyunyan Lyu, Haixiang Huang, and et al. The sustech-sysu dataset for automatically segmenting and classifying corneal ulcers. *Scientific Data*, 7:23, 2020. 2
- [14] Pablo D az, Laura Marcos, Antonio Anton, and et al. Papila: Dataset with fundus images and clinical data of both eyes of the same patient for glaucoma assessment. *Scientific Data*, 6:190083, 2019. 2
- [15] A. Diaz-Pinto, S. Morales, V. Naranjo, T. Koehler, J. M. Mossi, and A. Navea. Cnns for automatic glaucoma assessment using fundus images: an extensive validation. *BioMedical Engineering OnLine*, 18(1):29, 2019. 2
- [16] Zekun Dong, Xiang Luo, Tobias Elze, and et al. A large-scale functional dataset for glaucoma visual field prediction. *Scientific Data*, 10:597, 2023. 2
- [17] Zekun Dong, Xiang Luo, Mina Huh, and et al. Harvard glaucoma detection and progression dataset. *Scientific Data*, 10:600, 2023. 2
- [18] Zekun Dong, Xiang Luo, Mina Huh, and et al. A dataset for glaucoma detection and progression with visual fields and fundus images. *Scientific Data*, 10:601, 2023. 2
- [19] Zekun Dong, Xiang Luo, Mina Huh, and et al. Harvard-fairseg: A fair and diverse medical image segmentation dataset. *arXiv preprint*, arXiv:2404.XXXXX, 2024. 2
- [20] Huazhu Fu, Fang Li, Qin Hu, and et al. Palm: Pathologic myopia challenge and dataset. In *MICCAI 2019 OIA Workshop*, 2019. 2
- [21] Francisco Fumero, Jos  Sigut, Severiano Alay n, and et al. RIM-ONE DL: A glaucoma fundus image database for optic nerve head segmentation. *Scientific Data*, 7:1–10, 2020. 2
- [22] Asim Ghosh, Prithwjit Das, Avik Choudhury, and et al. Toxofundus: A retinal fundus image dataset for the diagnosis of ocular toxoplasmosis. *Scientific Reports*, 11:14059, 2021. 2
- [23] Yu Hu, Ying Gao, Wei Gao, and et al. Amd-sd: An optical coherence tomography image dataset for wet amd lesions segmentation. *Scientific Data*, 11:1014, 2024. 2
- [24] Mohammad Nurul Islam and colleagues. Eye disease image dataset. <https://www.kaggle.com/datasets/andrewmvd/eye-disease-classification>, 2020. Accessed 2025-11-15. 2
- [25] S. Islam, M. Hasan, M. Rahman, et al. Novel deep learning model for glaucoma detection using fusion of fundus and optical coherence tomography images. *Sensors*, 25(14):4337, 2025. Uses a private clinical dataset from Bangladesh Eye Hospital. 2
- [26] Qin Jin, Zaiwang Chen, Yong Xu, and et al. Fives: A fundus image dataset for vessel segmentation. *Scientific Data*, 9:94, 2022. 2
- [27] Kaggle and EyePACS. Diabetic retinopathy detection. <https://www.kaggle.com/c/diabetic-retinopathy-detection>, 2015. Kaggle competition dataset from EyePACS. 2
- [28] Daniel S. Kermany, Michael Goldbaum, Wenjia Cai, and et al. Identifying medical diagnoses and treatable diseases by image-based deep learning. *Cell*, 172(5):1122–1131, 2018. 2
- [29] H. Lemij, C. de Vente, et al. Justified referral in ai glaucoma screening (justraigs) challenge. Zenodo, 2024. 2
- [30] Chunyuan Li, Cliff Wong, Sheng Zhang, Naoto Usuyama, Haotian Liu, Jianwei Yang, Tristan Naumann, Hoifung Poon, and Jianfeng Gao. Llava-med: Training a large language-and-vision assistant for biomedicine in one day. *Advances in Neural Information Processing Systems*, 36:28541–28564, 2023. 11, 12, 13
- [31] Fuchen Li, Yuanhan Zhang, Sheng Shen, Yong Jae Lee, et al. Llava-next-interleave: Tackling multi-image, video, and multi-view in large multimodal models. *arXiv preprint arXiv:2407.07895*, 2024. 11, 12, 13
- [32] Jianyong Li, Huazhu Fu, Xun Sun, and et al. Gamma: A large-scale multi-modal dataset for glaucoma assessment. *Scientific Data*, 9:17, 2022. 2
- [33] Liu Li, Mai Xu, Xiaofei Wang, Lai Jiang, and Hanruo Liu. Attention based glaucoma detection: A large-scale database and cnn model. In *Proceedings of the IEEE/CVF Conference on Computer Vision and Pattern Recognition (CVPR)*, pages 10571–10580, 2019. 2
- [34] Ning Li, Ting Li, Huazhu Chen, and et al. A benchmark of ocular disease intelligent recognition: One shot for multi-disease detection. *arXiv preprint*, arXiv:2102.07978, 2021. 2
- [35] Tao Li, Yingqi Gao, Kai Wang, Song Guo, Hanruo Liu, and Hong Kang. Diagnostic assessment of deep learning algorithms for diabetic retinopathy screening. *Information Sciences*, 501:511–522, 2019. OIA-DDR dataset. 2
- [36] Haotian Liu, Chunyuan Li, Qingyang Wu, and Yong Jae Lee. Llava-1.5: Improved baselines with visual instruction tuning. *arXiv preprint arXiv:2310.03761*, 2023. 11, 12, 13

- [37] Risheng Liu, Chen Ma, Yutong Wang, et al. Deepdrid: Diabetic retinopathy–grading and image quality estimation challenge. *Patterns*, 3(7):100512, 2022. 2
- [38] Yuxuan Lu, Han Zhang, Yong Xu, and et al. Drac 2022: Diabetic retinopathy analysis challenge on ultra-widefield octa. In *MICCAI 2022 Ophthalmic Medical Image Analysis Workshop*, 2022. 2
- [39] Nasser Mohammed, Arash Tashk, and et al. OCTID: Optical coherence tomography image dataset. *Mendeley Data*, 3, 2016. 2
- [40] Wahid Norouzi, Xiaoyu Guo, Manoj P. Nallabothula, and et al. Farfum: A multi-center fundus image dataset for retinopathy of prematurity screening. *Scientific Data*, 11:XXX, 2024. FARFUM RoP dataset. 2
- [41] OpenAI. Gpt-5: Multimodal large language models for understanding complex visual inputs. *OpenAI Technical Report*, 2025. 11, 12, 13
- [42] OpenAI. Gpt-5 nano, 2025. Model documentation. 11, 12, 13
- [43] José Ignacio Orlando, Huazhu Fu, Joana Barbosa Breda, and et al. Refuge challenge: A unified framework for evaluating automated methods for glaucoma assessment from fundus photographs. *Medical Image Analysis*, 59:101570, 2020. 2
- [44] Saurabh Pachade, Deepayan De, Manesh Kokare, and et al. Rfmid: A retinal fundus multi-disease image dataset. *Scientific Data*, 8:249, 2021. 2
- [45] Praseon Porwal, Saurabh Pachade, Rahul Kamble, and et al. IDRiD: Diabetic retinopathy—segmentation and grading challenge. *Data*, 3(3):25, 2018. 2
- [46] Zhen Qin, Lu Fang, Zhihong Ding, and et al. OCTA-500: A retinal oct angiography dataset for age-related macular degeneration and diabetic retinopathy. *IEEE Transactions on Medical Imaging*, 39(12):4038–4050, 2020. 2
- [47] Diego Rodríguez, Ana Suárez, Jorge Novo, and et al. Mured: A multi-label retinal fundus image dataset for multi-disease classification. *Data in Brief*, 43:108357, 2022. 2
- [48] Mohammed H. Sarhan, Jun Wu, Jian Zhang, and et al. Olives: Ophthalmic labels for investigating visual semantic segmentation. *Scientific Data*, 9:274, 2022. 2
- [49] Andrew Sellergren, Sahar Kazemzadeh, Tiam Jaroensri, Atilla Kiraly, Madeleine Traverse, Timo Kohlberger, Shawn Xu, Fayaz Jamil, Cían Hughes, Charles Lau, et al. Medgemma technical report. *arXiv preprint arXiv:2507.05201*, 2025. 11, 12, 13
- [50] Shanghai AI Laboratory. Internvl-14b: Vision-language model by shanghai ai lab. <https://huggingface.co/OpenGVLab/InternVL-14B-224px>, 2024. Accessed: 2025-05-13. 11, 12, 13
- [51] Asia Pacific Tele-Ophthalmology Society. Aptos 2019 blindness detection. <https://www.kaggle.com/c/aptos2019-blindness-detection>, 2019. Accessed 2025-11-15. 2
- [52] Maria Stegiou, José Ignacio Orlando, Huazhu Fu, and et al. Refuge2 challenge: Multi-domain glaucoma assessment from fundus photographs. In *MICCAI 2022 OMIA Workshop*, 2022. 2
- [53] Jiri Timkovic, Radim Kolar, Martin Sramek, and et al. RetinalROP: A retinal fundus image dataset for retinopathy of prematurity screening. *Scientific Data*, 11:XXX, 2024. 2
- [54] Unknown. Retinal disease classification dataset (4 classes). <https://www.kaggle.com/datasets/andrewmvd/retinal-disease-classification>, 2019. Accessed 2025-11-15. 2
- [55] Jin Xu, Zhifang Guo, Hangrui Hu, Yunfei Chu, Xiong Wang, Jinzheng He, Yuxuan Wang, Xian Shi, Ting He, Xinfu Zhu, et al. Qwen3-omni technical report. *arXiv preprint arXiv:2509.17765*, 2025. 11, 12, 13
- [56] Weiwen Xu, Hou Pong Chan, Long Li, Mahani Aljunied, Ruifeng Yuan, Jianyu Wang, Chenghao Xiao, Guizhen Chen, Chaoqun Liu, Zhaodonghui Li, et al. Lingshu: A generalist foundation model for unified multimodal medical understanding and reasoning. *arXiv preprint arXiv:2506.07044*, 2025. 11, 12, 13
- [57] Jun Ma Yang, Rui Shi, Ziyuan Wang, and et al. Medmnist v2: A large-scale lightweight benchmark for 2d and 3d biomedical image classification. *Scientific Data*, 10:41, 2023. 2
- [58] Xiang Ye, Shuai Zhang, Hao Li, and et al. OIMHS: An oct image and mask dataset for retinal macular hole and cyst segmentation. *Scientific Data*, 10:XXX, 2023. 2
- [59] Z.ai. Glm-4.5v, 2025. Developer documentation. 11, 12, 13
- [60] Jiacheng Zhang, Rui Li, Cheng Liu, and Xiang Ji. Improving domain transfer with consistency-regularized joint distribution alignment for medical image classification. *Symmetry*, 17(4):515, 2025. Introduces the BiDR (Binary Diabetic Retinopathy) dataset. 2
- [61] Yong Zhao, Fan Yang, Xin Li, and et al. OCT5K: A large-scale optical coherence tomography dataset with multi-disease annotations. *Scientific Data*, 9:XXX, 2022. 2
